1 **Short Title:** *P. indica* employs host's putrescine for plant growth

2 **Corresponding author:** Jyothilakshmi Vadassery, PhD

3 National Institute of Plant Genome Research (NIPGR)

4 Aruna Asaf Ali Marg, P.O. Box 10531

5 New Delhi 110067

6 Tel: +91 (0)11 26735107; Fax: +91-(0)11-26741658

7

8 **Title:** *Piriformospora indica* employs host's putrescine for growth promotion in plants

9 **Authors and Affiliation:**

10 Anish Kundu, Abhimanyu Jogawat, Shruti Mishra, Pritha Kundu and Jyothilakshmi Vadassery\*

11 National Institute of Plant Genome Research (NIPGR), Aruna Asaf Ali Marg, New Delhi

12 110067, India

13 **One Sentence Summary:** *Piriformospora indica* elevates putrescine biosynthesis in Tomato  
14 roots, which induces growth phytohormones, auxin and gibberellin and results in plant's growth  
15 promotion.

16 **Foot Notes:**

17 **Authors' contributions**

18 JV and AK designed the study and planned the experiments. AK, AJ, SM and PK performed the  
19 experiments. AK, AJ, PK, SM and JV analyzed the data and wrote the manuscript. All authors  
20 have read and approved the final version of the manuscript.

21 **Funding information**

22 We acknowledge Department of Biotechnology (DBT), India through NIPGR core grant, and  
23 Max Planck-India partner group program of the Max Planck Society (Germany) for funding this  
24 work.

25 **Email ID of the Corresponding Author:** [jyothi.v@nipgr.ac.in](mailto:jyothi.v@nipgr.ac.in)

26

27 **Abstract**

28 Growth promotion by endosymbiont *Piriformospora indica* has been observed in various plants;  
29 however, specific functional metabolites involved in *P. indica* mediated growth promotion are  
30 unknown. A GC-MS based untargeted metabolite analysis was used to identify *Solanum*  
31 *lycopersicum* metabolites altered during *P. indica* mediated growth promotion. Metabolomic  
32 analysis showed primary metabolites altered and specifically putrescine to be maximally induced  
33 in roots during the interaction. *P. indica* induced putrescine biosynthetic gene *SIADC1* in *S.*  
34 *lycopersicum* and acts via arginine decarboxylase (*ADC*) mediated pathway. *P. indica* did not  
35 promote growth in *Sladc*-VIGS (virus induced gene silencing of *SIADC* gene) lines of *S.*  
36 *lycopersicum* and when the *ADC* enzyme was inhibited with an inhibitor, DL- $\alpha$ -  
37 (Difluoromethyl) arginine. In *Arabidopsis adc* knock-out mutants, *P. indica* do not promote  
38 growth and this response was rescued upon exogenous application of putrescine. Putrescine  
39 promoted growth by elevation of auxin (indole-3-acetic acid) and gibberellin ( $GA_4$ ,  $GA_7$ ) levels  
40 in *S. lycopersicum*. Putrescine is also important for *P. indica* hyphal growth indicating that it is  
41 co-adapted by both host and microbe. Hence, we conclude that putrescine is an essential  
42 metabolite and its biosynthesis in plants is crucial for *P. indica* mediated growth promotion and  
43 fungal growth.

44

45

46

47

48

49

50

51

52

53

## 54 **Introduction**

55 *Piriformospora indica* (syn. *Serendipita indica*, Basidiomycota) is a root endophytic fungus with  
56 a broad host range including monocots, dicots and eudicots (Varma et al., 1999; Johnson et al.,  
57 2018; Qiang et al., 2012). *Piriformospora indica* colonizes the root rhizodermis and cortex of  
58 many host plants including Arabidopsis, Maize, Tobacco, Barley, Rice and Poplar (Varma et al.,  
59 1999, Waller et al., 2005; Vadassery et al., 2008; Yadav et al., 2010; Jogawat et al., 2016).  
60 Increased nutrient uptake in the host plant is a major cause for *P. indica* induced plant growth  
61 promotion (Yadav et al., 2010; Bakshi et al., 2017; Rani et al., 2016; Prasad et al., 2019). *P.*  
62 *indica* also imparts biotic and abiotic stress tolerance by activating induced systemic resistance  
63 in shoots (Waller et al., 2005; Baltruschat et al., 2008; Sun et al., 2010; Jogawat et al., 2016). *P.*  
64 *indica* manipulates multiple plant hormone pathways during colonization: phytohormone,  
65 jasmonate and secondary metabolite, glucosinolate during early stages of interaction (Lahrmann  
66 et al., 2015), auxin and cytokinin during plant growth promotion in diverse plants (Xu *et al.*,  
67 2018). In many plants like barley, where *P. indica* causes cell death-associated colonization, the  
68 endophyte recruits GA signaling to degrade DELLAs and establish cell apoptosis susceptibility  
69 (Schäfer et al., 2009; Jacobs et al., 2011). Induced systemic resistance by *P. indica* in host plants  
70 is mediated by jasmonic acid signaling, GA signaling and cytoplasmic function of NPR1  
71 (NONEXPRESSOR OF PATHOGENESIS-RELATED GENES 1) (Stein et al., 2008, Cosme et  
72 al., 2016). Plants also regulate the colonization through activation of basal defense pathway via  
73 cyclic nucleotide gated channel (CNGC19), which ensures controlled *P. indica* colonization  
74 (Jacobs et al., 2011; Jogawat et al., 2020). Elevated levels of plant-secondary metabolite, indole  
75 glucosinolate also restrict the propagation of *P. indica* and balance its growth on plant roots  
76 (Lahrmann et al., 2015). Global transcriptome and metabolome analysis has revealed the  
77 beneficial effects of *P. indica* on host plants such as Arabidopsis (Vahabi et al., 2015; Strehmel  
78 et al., 2016), barley (Molitor et al., 2011; Zuccaro et al., 2011; Ghabooli et al., 2013) and chinese  
79 cabbage (Hua et al., 2017). *P. indica*-mediated reprogramming of host plant's transcriptome,  
80 proteome and metabolome under salt, water and drought stress has also been explored (Waller et  
81 al., 2005; Molitor et al., 2011; Alikhani et al., 2013; Ghabooli et al., 2013). In Arabidopsis, it has

82 been observed that *P. indica* association primarily affects primary root metabolism and  
83 secondary metabolites like glucosinolates, oligolignols, and flavonoids (Strehmel *et al.*, 2016). In  
84 chinese cabbage, *P. indica* alters  $\gamma$ -amino butyrate (GABA), oxylipin-family compounds, poly-  
85 saturated fatty acids, and auxin and its intermediates (Hua *et al.*, 2017). No study so far assigns a  
86 functional role for a specific metabolite in *P. indica* mediated growth promotion across plants.  
87 Tomato (*Solanum lycopersicum* L.) is one of the most important vegetables grown worldwide  
88 with 177 million ton production (Saeed *et al.*, 2019). However, Tomato has been least explored  
89 for its interaction with *P. indica* and beneficial effects. *P. indica* reduces the disease symptoms  
90 caused by the fungal pathogen *Verticillium dahliae* and repress the amount of Pepino mosaic  
91 virus in Tomato. It also increases Tomato fruit biomass in hydroponic culture and dry matter  
92 content (up to 20%) (Fakhro *et al.*, 2010; Sarma *et al.*, 2011). *P. indica* enhances the growth,  
93  $\text{Na}^+/\text{K}^+$  homeostasis, antioxidant enzymes and yield of tomato plants under normal and salt stress  
94 conditions (Abdelaziz *et al.*, 2019). The metabolites involved in Tomato - *P. indica* interaction is  
95 poorly investigated despite the economic importance of this Solanaceous plant and growth  
96 enhancing role of *P. indica*. In this study, we investigated the metabolome alterations in *S.*  
97 *lycopersicum* during *P. indica* colonization to identify specific metabolites involved in *P. indica*  
98 mediated growth promotion.

99 Polyamines (PA) are low molecular weight carbon and nitrogen rich aliphatic compounds  
100 containing two or more amino groups that are essential for cell proliferation (Chen *et al.*, 2019).  
101 In plants, PAs are mainly present in their free form as Putrescine (Put), Spermidine (Spd), and  
102 Spermine (Spm), soluble conjugated (to small molecules including phenolics) and insoluble  
103 bound form (bound to DNA, RNA, proteins) (Chen *et al.*, 2019). Spermidine and spermine are  
104 synthesized from putrescine by sequential additions of amino propyl groups derived from  
105 decarboxylated S-adenosyl-Met (SAM) (Vuosku *et al.*, 2012). Putrescine is synthesized from the  
106 amino acid ornithine and arginine by ADC (arginine decarboxylase) and ODC (ornithine  
107 decarboxylase) mediated pathways (Kusano *et al.*, 2008; Liu *et al.*, 2015). Polyamines including  
108 putrescine and spermidine are known to be involved in plant growth and development (Kusano *et*  
109 *al.*, 2008, Takahasi & Kakehi, 2010, Liu *et al.*, 2015), interactions of plants with growth  
110 promoting rhizobacteria (Valette *et al.*, 2019) and also in plant defense against abiotic stresses  
111 (Kumria & Rajam, 2002; Cuevas *et al.*, 2008; Alcázar *et al.*, 2010). In this work, we dissect the

112 metabolomic alterations induced by *P. indica* in *S. lycopersicum* roots and characterize the  
113 functional role of this highly induced metabolite.

114

115

## 116 **Results**

### 117 **Endophytic fungus, *Piriformospora indica* stimulates root and shoot growth of *S.*** 118 ***lycopersicum***

119 To study the time course of *P. indica* growth and colonization pattern in tomato, we conducted a  
120 growth promotion assay at different days post inoculation (dpi). Chlamydo spores were visible in  
121 the root cortex at 10 dpi with *P. indica* (Fig. S1), though no growth promotion was observed.  
122 After 30 dpi, growth promotion by *P. indica* was first observed (Fig. S2A) and at 40 dpi, the  
123 inoculated plants showed maximum growth promotion (Fig. 1A). For tracking of colonization, a  
124 green fluorescent protein (GFP)-tagged *P. indica* strain was utilized (Hilbert et al., 2012,  
125 Jogawat et al., 2020), and we observed both the chlamydo spores and fungal hyphae in root  
126 cortex at 40 dpi, indicating endophytic colonization (Fig. 1B). The first significant stimulation of  
127 growth parameters in *P. indica*-treated plants were observed after 30 dpi and maximum at 40 dpi  
128 as compared to the control plants (Fig. 1C). At this stage, root fresh weight (Fig. 1D, 1E), shoot  
129 and root length (Fig. S2B, S2C) were also found to be significantly increased in *P. indica* treated  
130 plants. We quantified the fungal DNA content in the roots and observed around 8 fold increase at  
131 30 dpi and around 30 fold increase at 40 dpi, over the control (0 dpi is the first day of fungal  
132 inoculation) (Fig. 1F). As at 40 dpi maximum fungal colonization and growth promotion was  
133 observed, we selected this time point for further investigations.

### 134 ***Piriformospora indica* colonization alters leaf and root metabolites of *S. lycopersicum***

135 To explore the global metabolome alteration in tomato upon *P. indica* colonization, we  
136 conducted untargeted gas chromatography-mass spectrometry (GC-MS) analysis at 40 dpi in  
137 both shoots and roots separately. We also profiled the *P. indica* hyphal (mycelia) metabolome, to  
138 distinguish tomato-specific metabolites. Metabolite profiling revealed in total 425 mass signals  
139 (124 for leaf, 163 for root and 138 for *P. indica* mycelia), among which 55 were identified and

140 annotated in leaf, 70 in root and 102 in *P. indica* mycelia (Fig. 2A, Table S2). A comparative  
141 analysis of annotated metabolites revealed 76 mycelia specific, 22 root specific and 9 leaf  
142 specific metabolites (Fig. 2B). Root and leaf shared 45 metabolites, root and mycelia shared 3  
143 metabolites, leaf and mycelia shared only 1 metabolite while 22 metabolites are shared by root,  
144 leaf and mycelia (Fig. 2B, Table S3). The annotated metabolites in tomato covered a broad range  
145 of primary metabolites including sugars and amino acids, while only three secondary metabolites  
146 (caffeic acid, chlorogenic acid and benzoic acid) were identified (Table S2). Normalized peaks  
147 of annotated leaf and root metabolites were used for ‘Pearson correlation coefficient’ (PCC)  
148 calculation, which revealed a strong positive correlation between control and treated data sets of  
149 leaf (PCC = 0.89) and root (PCC = 0.87) metabolites (Fig. S3a and S3b). To get a global view of  
150 fold changes of metabolites shared by leaf and root we created a Pearson’s correlation based  
151 clustered heat map (Fig. 2C). Metabolite fold changes in leaf and root showed negatively  
152 correlated clusters. We further analyzed correlation among leaf and root on the basis on  
153 metabolite fold changes and constructed a correlation network where leaf and root showed  
154 negative correlation (Fig 2D). This indicates *P. indica* infestation in root alters root and leaf  
155 metabolome reversibly.

### 156 **Putrescine is a central metabolite altered in tomato roots upon *P. indica* colonization**

157 Metabolite fold changes (fold of up- or down-regulation of each metabolite’s normalized peak  
158 area in *P. indica* colonized plant compared to control plant) were calculated from GC-MS data-  
159 set for root and leaf specific metabolites (Table S4). In leaf, volcano plot showed up-regulation  
160 of five metabolites i.e. 12-hydroxyoctadecanoic acid, glucaric acid,  $\beta$ -D-lactose, arabinose,  
161 fructose and down-regulation of four metabolites i.e. L-alanine, chlorogenic acid, azelaic acid  
162 and 2, 3-butanediol (Fig. S4). Metabolites having an alteration cut-off value of  $P < 0.05$  and  
163  $FC > 1.5$  were considered as ‘significantly altered’ in the volcano plot.

164 As *P. indica* is a root infecting endophyte we decided to specifically look at root specific  
165 metabolites. First we performed a partial least squares-discriminant analysis (PLS-DA) with all  
166 root metabolite data. Control and *P. indica* infested roots were classified in two different groups  
167 indicating a clear divergence in their metabolite levels (Fig. 3A). A variables of importance  
168 (VIP)-score plot was generated from the PLS-DA model, which showed that metabolite  
169 putrescine has highest VIP score ( $> 1.38$ ) indicating its significance among altered metabolites

170 (Fig. 3B). Volcano plot showed up-regulation of eight metabolites i.e. Putrescine (1'), Gluconic  
171 acid (2'), Glucaric acid (3'), L-Alanine (4'), Propanoic acid (5'), L-Glutamic acid (6'), Lactic  
172 acid (7') and Acetoin (8') and also significant down-regulation of eight metabolites i.e. Benzoic  
173 acid (9'), Myo-inositol (10'), Azelaic acid (11'), Phenylpyruvic acid (12'), Fumaric acid (13'),  
174 L-Valine (14'), 9,12-Octadecadienoic acid (15') and Shikimic acid (16') (Fig. 3C and Fig. S5A  
175 and B). In roots, putrescine showed maximum increase and benzoic acid showed maximum  
176 decrease (Fig. 3C and Fig. S5A and B). In GC-MS analysis, putrescine was not detected in *P.*  
177 *indica* mycelia, therefore, for confirmation we performed LC-MS/MS analysis, where putrescine  
178 was observed in very low intensity (Fig 3D), which indicates its increase is majorly root specific.  
179 We also analyzed the root metabolite data with metabolite marker selection approach (Zang et  
180 al., 2013) and performed orthogonal partial least-squares to latent structures discriminant  
181 analysis (OPLS-DA) and generated an S-plot. S-plot showed putrescine to have highest  
182 reliability and magnitude ( $p[1]6.1$ ;  $p(\text{corr})[1] 0.997$ ) to be a metabolite marker (Fig. S5C).  
183 Therefore, putrescine has been considered as the most significant metabolite during interaction in  
184 between *P. indica* and *S. lycopersicum* root.

185 Pathway analysis with significantly altered ( $P < 0.05$ ) annotated root metabolite data set showed a  
186 plausible involvement of 46 metabolic processes (Fig. S6 and Table S5). We considered  
187 pathways having  $P < 0.05$ ,  $\text{impact} > 0.1$  as truly impacted pathways. Among the top three pathways  
188 alanine, aspartate and glutamate metabolism showed highest impact ( $P = 2.48e^{-07}$ ,  $\text{impact} =$   
189  $0.327$ ), followed by tyrosine metabolism ( $P = 5.92e^{-06}$ ,  $\text{impact} = 0.108$ ) and arginine and proline  
190 metabolism ( $P = 2.17e^{-05}$ ,  $\text{impact} = 0.144$ ). Metabolite-metabolite interaction network predicted  
191 404 nodes (metabolites) and 830 edges (interactions) (Fig. 3E and Table S6). The up-regulated  
192 putrescine, L-glutamic acid and L-alanine have direct interaction with each other and with down-  
193 regulated phenylpyruvic acid and L-proline which indicates coordination among them. But no  
194 interaction was found with the other two up-regulated metabolites (acetoin and gluconic acid)  
195 and down-regulated, octadecadienoic acid (Fig. 3F). These results further signify the importance  
196 of highly upregulated putrescine to be majorly involved in metabolic interaction with other up-  
197 regulated molecules during tomato and *P. indica* interaction. For confirmation of these  
198 interactions, we performed a Pearson's correlation based network analysis in between the  
199 interacting metabolites, and observed putrescine is positively correlated in alteration with the  
200 acetoin, gluconic acid, L-alanine and L-glutamic acid whereas, negatively correlated with

201 proline, linoleic acid and phenylpyruvic acid (Fig 3G). Interestingly, gluconic acid showed  
202 strong positive correlation (PCC = 0.70583) but without significance ( $P = 0.117$ ). Finally, we  
203 did an absolute quantification of putrescine independently using LC-MS/MS method, to show a  
204 highly significant elevation of putrescine content in *S. lycopersicum* roots upon *P. indica*  
205 colonization (Fig. 3H).

### 206 ***P. indica* induced putrescine biosynthetic gene in *S. lycopersicum***

207 As putrescine level significantly increased in *S. lycopersicum* roots upon *P. indica* colonization,  
208 we examined the expression levels of putrescine biosynthetic genes. Putrescine is synthesized  
209 from the amino acids arginine and ornithine by ADC and ODC mediated pathways and genes  
210 involved in the process are arginine decarboxylase (*SlADC1* and *SlADC2*) and ornithine  
211 decarboxylase (*SlODC1*, *SlODC2* and *SlODC3*) (Liu et al., 2018). We checked all five gene  
212 (*SlADC* and *SlODC*) transcript levels in *S. lycopersicum* colonized by *P. indica*. We found  
213 significantly increased transcript level only for *SlADC1*, and no transcript induction was  
214 observed for any *SlODC* (Fig. 4A), which confirmed that *P. indica* induced putrescine  
215 biosynthesis is through arginine decarboxylase (ADC) mediated pathway.

### 216 **Putrescine induced growth of both *P. indica* and *S. lycopersicum***

217 Polyamines were previously reported to have role in fungal cell differentiation and development  
218 (Stevens and Winther, 1979, Ruiz-Herrera, 1993). We checked whether putrescine, has a role in  
219 *P. indica* growth *per se*, thus providing an advantage for its up-regulation. Five different  
220 putrescine concentrations (5  $\mu$ M-100  $\mu$ M) were tested to check its effect on the radial growth of  
221 *P. indica*. It was observed that 10  $\mu$ M putrescine significantly induced *P. indica* radial growth,  
222 while putrescine concentration higher than 10  $\mu$ M did not induce further radial growth (Fig. 4C;  
223 Fig. S8A). For additional confirmation, we applied 10  $\mu$ M putrescine in the liquid *P. indica*  
224 culture, which showed significant induction in both the fresh and dry biomass (Fig. S8 B, C)  
225 after 14 days of treatment. These results suggest putrescine enhances growth of *P. indica*. We  
226 attempted to identify the specific role of putrescine in *S. lycopersicum* growth, and therefore,  
227 exogenously treated 5 day old tomato seedlings. After 21 days of treatment, we found significant  
228 induction in multiple growth parameters of *S. lycopersicum* (Fig. 4D), including shoot fresh  
229 weight (Fig. 4E), root fresh weight (Fig. 4F) and shoot length (Fig. S7). Hence, putrescine is



230 involved in growth promotion of *S. lycopersicum*. In the volcano plot, apart from putrescine,  
231 gluconic acid is also increased significantly and was second most significantly upregulated  
232 metabolite. Therefore, we further examined the comparative effect of putrescine and gluconic  
233 acid in 5 day old *S. lycopersicum* seedlings. 21 days of treatment, 10  $\mu$ M gluconic acid did not  
234 show any growth promotion, whereas 10  $\mu$ M putrescine promoted the growth significantly (Fig.  
235 4A).

### 236 **Putrescine induced growth promotion in *S. lycopersicum* by elevating auxin and gibberellin** 237 **biosynthesis**

238 Auxin and cytokinin are major growth hormones involved in plant growth promotion response of  
239 *P. indica* in diverse plants (Sirrenberg et al., 2007; Vadassery et al., 2008; Meents et al., 2019).  
240 *P. indica* needs also induces the GA biosynthesis during colonization (Cosme et al., 2016).  
241 Hence we addressed the possible involvement of putrescine to alter these growth hormone levels  
242 in *S. lycopersicum*. We measured indole-3-acetic acid (IAA), five gibberellins (GA<sub>1</sub>, GA<sub>3</sub>, GA<sub>4</sub>,  
243 GA<sub>7</sub> and GA<sub>8</sub>) and nine cytokinins (tZ, *trans*-zeatin; tZR, *trans*-zeatin riboside; DHZR,  
244 dihydrozeatin riboside; tZROG, *trans*-zeatin riboside-*O*-glucoside; tZ7G, *trans*-zeatin-7-  
245 glucoside; DHZ, dihydrozeatin; DHZROG, dihydrozeatin riboside-*O*-glucoside; DHZOG,  
246 dihydrozeatin-*O*-glucoside; iP, isopentenyladenine) in the putrescine treated *S. lycopersicum*  
247 seedlings. It was observed that IAA level increased significantly in the putrescine-treated  
248 seedlings (Fig. 5A). Similarly, GA<sub>4</sub> and GA<sub>7</sub> were also significantly increased (Fig. 5B). No rise  
249 were observed in the cytokinin levels, instead DHZR, tZ7G and DHZ levels decreased  
250 significantly (Fig. 5C). This result signifies the involvement of IAA and GAs in putrescine  
251 induced growth promotion.

### 252 **Putrescine biosynthesis is crucial for *P. indica* mediated growth promotion in *S.*** 253 ***lycopersicum* and *A. thaliana***

254 We then tested if putrescine biosynthesis functionally plays a role in *P. indica*-mediated growth  
255 induction. A *S. lycopersicum* line was generated where *SIADC1* was silenced by virus-induced  
256 gene silencing (VIGS) approach (Fig. S9 and S10). The line was confirmed by checking *SIADC1*  
257 transcript level compared to the control i.e. empty vector transformed (EV) plants. After 7 days  
258 and 14 days post agro infiltration of VIGS construct, they were silenced upto 97.41% and

259 85.93% respectively (Fig. 6A). At this stage putrescine content was measured and found to be  
260 significantly reduced (Fig. 6B), which confirmed the *ADC* silencing. Both EV and *adc1*-VIGS  
261 plants under control conditions showed no growth differences, However, upon co-cultivation  
262 with *P. indica* for 40 dpi, both the shoots and roots of *adc1*-VIGS plants showed no growth  
263 promotion when compared to EV+ *P. indica* plants (Figs. 6C, 6D and 6E). In order to reconfirm  
264 the importance of *ADC*-mediated putrescine biosynthesis, we treated the *S. lycopersicum*  
265 seedlings in the media with DL- $\alpha$ -(Difluoromethyl) arginine (DFMA), an irreversible inhibitor of  
266 *ADC* enzyme, which was previously reported to efficiently reduce cellular putrescine level in *S.*  
267 *lycopersicum* (Fernández-Crespo et al., 2015). It was observed that *P. indica* showed reduced  
268 growth promotion in the DFMA treated *S. lycopersicum* seedlings compared to control. Both the  
269 shoot and root fresh weights were reduced in the DFMA treated seedlings (Fig. S11A and B). On  
270 the other hand, 2 weeks of DFMA treatment did not show any inhibitory activity on *P. indica*  
271 growth (Fig. S11C and D). These results reconfirm importance of *ADC1* in *P. indica*-mediated  
272 growth promotion in *S. lycopersicum*.

273 To study the role of putrescine biosynthesis across plants, we checked its effect on Arabidopsis.  
274 *A. thaliana* seedlings grown on media with 10  $\mu$ M putrescine showed a significant induction of  
275 both fresh weight ( $P < 0.01$ ) (Fig. 7A and B) and root length ( $P < 0.001$ ) (Fig. S12A). Previously,  
276 it was reported that overproduction of putrescine and other polyamines reduced the growth in  
277 Arabidopsis (Alcázar et al., 2005), but here the results indicate that exogenous application of low  
278 concentration (10  $\mu$ M) of putrescine stimulates growth in Arabidopsis. For functional  
279 characterization of the *adc* mutants in Arabidopsis we used the previously reported lines (Cuevas  
280 et al., 2018). *adc1-2* (SALK\_085350C), *adc 1-2*(CS9658), *adc1-3*(CS9657), *adc2-3*(CS9659)  
281 and *adc2-4*(CS9660) (Fig. S12B and C) and treated them with *P. indica*. It was previously  
282 demonstrated that *adc1-2*, *adc1-3*, *adc2-3* and *adc 2-4* accumulated significantly less amount of  
283 free putrescine (Cuevas et al., 2018). In our experiment, we found that after 14 dpi, fresh weight  
284 and root length were significantly induced only in wild type, whereas *adc* mutants did not show  
285 any growth promotion (Fig. 5C, D; Fig. S12D). This result signifies that *P. indica* fails to induce  
286 plant's growth when putrescine biosynthesis is impaired. In a parallel experiment we performed  
287 a complementation assay, where *adc* mutants (*adc 1-2*, *adc 1-3*, *adc 2-3* and *adc 2-4*) were treated  
288 with *P. indica* in a media containing 10  $\mu$ M putrescine. After 14 dpi of *P. indica* inoculation,  
289 both fresh weight (Fig. 7C and D) and root length (Fig. S12D) were increased in putrescine

290 complemented mutants, which signifies that exogenous putrescine complemented the mutant  
291 phenotype. These result confirms that putrescine is required for *P. indica*-mediated growth  
292 induction in both *Arabidopsis* and *S. lycopersicum*.

## 293 Discussion

294 Mutualistic interactions of plants with *P. indica* can enhance growth through mechanisms such  
295 as nutrient uptake (phosphate and nitrate uptake, sugar transport), phytohormone production  
296 (auxin and cytokinin) and indirectly through induced systemic resistance (Yadav *et al.*, 2010 ;  
297 Sherameti *et al.*, 2005; Rani *et al.*, 2016; Vadassery *et al.*, 2009; Sirrenberg *et al.*, 2007; Vahabi  
298 *et al.*, 2018). Plant roots release many metabolites into the rhizosphere to kick-start symbiotic  
299 interactions, including flavonoids that act as chemo-attractants for rhizobial bacteria (Liu *et al.*,  
300 2016; Oldroyd 2013) and strigolactones for mycorrhizal fungi (Besserer *et al.*, 2006). Roots also  
301 accumulate metabolites and transport it to shoots as in the case of blumenol C-glucoside  
302 accumulation upon mycorrhizal colonization in *Nicotiana attenuata* (Wang *et al.*, 2018). Host  
303 plant metabolites that are responsible for *P. indica* mediated plant growth promotion are not  
304 known. In Chinese cabbage roots, *P. indica* stimulated the synthesis of metabolites involved in  
305 the tryptophan and phenylalanine metabolism and  $\gamma$ -aminobutyrate (GABA). Tryptophan and  
306 indole metabolism were speculated to be used for *de novo* biosynthesis of auxin in *P. indica*-  
307 colonized roots, facilitating growth promotion in Chinese cabbage. (Hua *et al.*, 2017). Here, we  
308 report the identification and functional characterization of a specific metabolite, putrescine, to be  
309 involved in growth promotion response of *S. lycopersicum* upon *P. indica* colonization.

310 Metabolite analysis shows that host pathways in roots targeted by *P. indica* belong to primary  
311 metabolism, including amino acids and polyamines. In tomato roots the polyamine, putrescine  
312 was the highest induced metabolite upon *P. indica* colonization after establishment of the  
313 symbiotic interaction at 40 dpi. Multivariate statistical analysis and metabolite marker finding  
314 approach also suggested putrescine as mostly highlighted candidate among the eight upregulated  
315 root metabolites. Out of these upregulated root metabolites, alteration of putrescine, L-glutamic  
316 acid, L-alanine, phenylpyruvic acid and L-proline directly interact with each other in the  
317 metabolite-metabolite interaction network analysis. Pathway analysis with significantly altered  
318 root metabolites also revealed amino acid, arginine and glutathione metabolism to be altered in *S.*

319 *lycopersicum* root. Arginine and glutathione metabolisms regulate putrescine and glutamic acid  
320 level in the cell respectively; arginine is the precursor in putrescine biosynthesis, while glutamic  
321 acid is the precursor as well as degradation product of the glutathione (Mo *et al.*, 2015; Liu *et al.*,  
322 2010). In previous reports it was also demonstrated that during antioxidant based defense,  
323 exogenous polyamines induces glutathione level to reduce the overproduction of reactive oxygen  
324 species (Nahar *et al.*, 2016 a, b). Significant impact of arginine metabolism indicates the  
325 primary involvement of putrescine biosynthetic pathway during *P. indica* interaction with *S.*  
326 *lycopersicum*. In our study, transcript level of putrescine biosynthetic gene *SIADC1*, was induced  
327 in *P. indica* colonized root. The knock-down of *adc* genes in Arabidopsis and tomato also  
328 resulted in loss of growth promotion response. Hence *P. indica* induces putrescine biosynthesis  
329 only by arginine decarboxylase mediated pathway which is functionally important for growth  
330 promotion. In tomato, *ADC* and *ODC* have differential tissue expression and *ADC* is root  
331 expressed (Acosta *et al.*, 2005; Kwak & Lee, 2001). *P.indica* also produces putrescine in a very  
332 less concentration in whole mycelia, however this does not complement the phenotype of *adc*  
333 mutants suggesting the critical role of plant induced putrescine. However, our study does not rule  
334 out involvement of additional functional metabolites at different stages of *P. indica* colonization.

335 Polyamines are also known to be involved in plant embryogenesis and growth (Kusano *et al.*,  
336 2008, Takahasi & Kakehi, 2010, Liu *et al.*, 2015). Though, overproduction of putrescine and  
337 other polyamines reduced the growth in Arabidopsis (Alcázar *et al.*, 2005), its affirmative effect  
338 on root cultures of chicory is reported (Bais *et al.*, 2001). Thermospermin plays a role in stem  
339 elongation of Arabidopsis (Knott *et al.*, 2007). A double mutant of putrescine biosynthetic gene,  
340 arginine decarboxylase (*adc1/adc2*<sup>-</sup>) and spermidine biosynthetic gene, spermidine synthase  
341 (*spds1/spds2*<sup>-</sup>) showed lethal defect in embryo development in Arabidopsis (Imai *et al.*, 2004;  
342 Urano *et al.*, 2004). Polyamines, including putrescine, are known to be induced upon abiotic and  
343 biotic stress (Liu *et al.*, 2015; Minocha *et al.*, 2014; Seifi & Shelp 2019). Upon salt stress,  
344 putrescine levels are elevated in *Oryza sativa* and *Nicotiana tabacum*, on the other hand, drought  
345 stress also induces putrescine in Arabidopsis and *Oryza sativa* (Roy & Wu, 2001; Kumria &  
346 Rajam, 2002; Alcázar *et al.*, 2010; Capell *et al.*, 2004). Putrescine biosynthetic mutants (*adc1*  
347 and *adc2*) in Arabidopsis with decreased levels of putrescine, resulted in altered responses  
348 against freezing (Cuevas *et al.*, 2008). Role of putrescine is also known from other symbiotic  
349 interactions. In rice, a common metabolomic signature upon interaction with plant growth

350 promoting rhizobacteria, is the increased accumulation of hydroxycinnamic acid amides  
351 (HCAA), identified as *N-p*-coumaroyl putrescine and *N*-feruloyl putrescine (Valette *et al.*, 2019).  
352 An accumulation of coumaroyl putrescine, and *N*-feruloyl putrescine is also reported in early  
353 developmental stages of barley mycorrhization (Peipp *et al.*, 1997). Putrescine when supplied  
354 exogenously induced the growth of *S. lycopersicum* and *P. indica* indicating that the polyamine  
355 is co-adapted by both host and microbes. In plants, it is known that low amounts of these  
356 exogenous polyamines can act as growth stimulants (Martin-Tanguy 2001). Homeostasis of  
357 polyamines is tightly regulated because higher levels of polyamines are toxic to cells and causes  
358 cell death (Kusano *et al.*, 2008). For example, overexpression of polyamine biosynthesis gene  
359 *ADC2* reduced growth in Arabidopsis (Alcázar *et al.*, 2005). Elevation of *in vitro* growth of *P.*  
360 *indica* upon exogenous putrescine treatment suggests its role in hyphal growth. Interestingly,  
361 higher concentration of putrescine than 10  $\mu$ M leads to the saturation level of growth promotion,  
362 which indicates optimal concentration of putrescine for growth promotion. Putrescine and  
363 spermidine are involved in regulating hyphal growth of arbuscular mycorrhizal fungi, *Glomus*  
364 *mosseae* due to endogenous concentration of these compounds in spores being a growth limiting  
365 factor (Ghachtouli *et al.*, 1996).

366 It is well known that PA interacts with hormones to regulate the growth and development  
367 of plants (Liu *et al.*, 2013, Li *et al.*, 2018). Auxin and cytokinin are major growth hormones  
368 involved in plant growth promotion response of *P. indica* in diverse plants (Xu *et al.*, 2018). *P.*  
369 *indica* induces a rapid increase in auxin levels during early recognition phases which is crucial  
370 for reprogramming root development (Meents *et al.*, 2019). Auxin level increased upon *P. indica*  
371 infestation in Arabidopsis roots (Vadassery *et al.*, 2008) and *P. indica* also produces IAA in  
372 liquid culture (Sirrenberg *et al.*, 2007). Several reports demonstrate that *P. indica* interferes with  
373 auxin production and signaling in the hosts and contribute to root growth (Sirrenberg *et al.*,  
374 2007; Vadassery *et al.*, 2008; Lee *et al.*, 2011; Dong *et al.*, 2013; Ye *et al.*, 2014; Kao *et al.*,  
375 2016; Hua *et al.*, 2017). A significant increase in auxin (IAA) level in *S. lycopersicum* seedlings  
376 upon putrescine treatment confirmed putrescine-mediated auxin alteration. Interestingly, auxin  
377 responsive elements are located in the promoters of *SLADCI* (Liu *et al.*, 2018) and could play a  
378 role in its regulation. *P. indica* colonization is known to up-regulate several GA biosynthesis  
379 genes. GA-deficient *gal-6* mutant reduce *P. indica* colonization, whereas the quintuple-DELLA  
380 mutant can increase colonization (Schäfer *et al.*, 2009; Jacobs *et al.*, 2011). GA elevation in rice

381 roots by *P. indica* can induce plant tolerance to root herbivory (Cosme et al., 2016). Furthermore,  
382 polyamines are observed to be involved in gibberellin induced development in grape berries and  
383 peas (Shiozaki et al., 1998; Smith et al., 1985). Therefore, increased level of GA<sub>4</sub> and GA<sub>7</sub> in  
384 putrescine treated *S. lycopersicum* seedlings might be crucial for growth promotion. How  
385 putrescine a primary metabolite involved in diverse plant process has been co-adapted by a  
386 symbiotic microbe for enhancing bi-directional growth is the focus of future study.

## 387 **Conclusion**

388 *P. indica* colonization realigns the *S. lycopersicum* metabolism including polyamine biosynthetic  
389 pathway in root, where biosynthesis of a major polyamine, putrescine, is significantly induced  
390 through ADC-mediated pathway. Putrescine plays a vital role during interaction between *P.*  
391 *indica* and *S. lycopersicum* as well as *Arabidopsis* and is inevitable for their growth promotion  
392 by *P. indica*. Our work sheds the light on a mechanism where *P. indica* employs ADC-mediated  
393 putrescine biosynthesis in *S. lycopersicum* to promote its own growth into the host plant's roots.  
394 Simultaneously, host plant allows induction of putrescine biosynthesis as it helps in plant's  
395 growth promotion via Auxin and GA induction (Fig. 8).

## 396 **Materials and Methods**

### 397 **Plant growth and *P. indica* co-cultivation**

398 *P. indica* (Verma et al., 1998) culture was grown and maintained on Kaefer medium (Varma et  
399 al., 1999) at 28±2°C and 110 rpm in orbital shaker. Tomato (*Solanum lycopersicum*, cv. Pusa  
400 Ruby) seeds were pre-soaked in water overnight, kept on a moist tissue paper for 5 days in dark  
401 and after germination co-cultivated with 1% *P. indica* (w/w) in soilrite (horticulture grade  
402 expanded perlite, irish peat moss, and exfoliated vermiculite in equal ratio i.e., 1:1:1, w:w:w).  
403 The plants were grown at 26°C (day/night: 16/8 h), relative humidity 60% and light intensity 300  
404 µmol/m<sup>2</sup>/ sec for different time points (10dpi, 20dpi, 30dpi and 40dpi). Control plants were  
405 cultivated without *P. indica* inoculation. Fungal colonization was detected using trypan blue  
406 staining of root segments (Fig. S1). Simultaneously, tomato roots colonized with GFP-tagged *P.*  
407 *indica* (Hilbert et al., 2012, Jogawat et al., 2020) were also harvested for visualization of  
408 colonization under confocal microscope (Leica TCS M5). GFP-tagged *P. indica* were received  
409 from Prof. Ralf Oelmüller (Friedrich Schiller University, Jena, Germany).

410 For experiments with *Arabidopsis*, seeds of wild type (ecotype Columbia) and *adc 1-2*  
411 (SALK\_085350C), *adc 1-2* (CS9658), *adc 1-3* (CS9657) and *adc 2-3* (CS9659), *adc 2-4*  
412 (CS9660) mutant lines with T-DNA insertion in the exons (Alonso et al., 2003) from TAIR were  
413 used. Seeds were surface-sterilized, stratified and placed on half-strength MS plates  
414 supplemented with 1% sucrose and 0.8% agar and germinated for 7 days. The seedlings were  
415 grown at 22°C, 10 h light/14 h dark photoperiod and a light intensity of 150  $\mu\text{mol m}^{-2} \text{s}^{-1}$  in  
416 growth chamber (Percival). These seedlings were transferred to 1× PNM (plant nutrient medium)  
417 medium (Hilbert et al., 2012, Johnson et al., 2013) for co-cultivation with *P. indica*. Samples  
418 were harvested at 14dpi stage

### 419 **Visualization and study of *P. indica* colonization**

420 For observation of *P. indica* colonization in *S. lycopersicum*, the roots were harvested, washed  
421 and softened using 10% KOH, acidified in 1 M HCl and then stained with 0.02% Trypan blue for  
422 1 h at 65°C. The samples were then de-stained in 50% lacto-phenol for 2 h (Dickson and Smith,  
423 1998). The roots were observed under light microscope (Nikon 80i). For confocal microscopy,  
424 the tomato roots were colonized with GFP-tagged *P.indica* strain (Hilbert et al., 2012). At 40 dpi  
425 the roots were harvested and observed under a confocal microscope (Leica TCS M5) at an  
426 emission wavelength of 505-530 nm, 470 nm excitation and digital sectioning of 4-5  $\mu\text{m}$  of root  
427 thickness (Jogawat et al., 2020). The relative amount of fungal DNA was quantified in 30 and 40  
428 dpi roots using real time-qPCR utilizing *UBI3* and *P. indica Tef1* (Bütehorn et al., 2000).  
429 Relative changes in fungal DNA content were calculated using  $C_T$  of *PiTef1* which were  
430 normalized by  $C_T$  of *UBI3* using  $\Delta\Delta\text{CT}$  equation and *P. indica* DNA content in control roots (0  
431 dpi) was defined as 1.0 (Vadassery et al., 2008, Jogawat et al., 2020). The primer pairs used in  
432 the gene expression studies are given in Table S1.

### 433 **Untargeted metabolite profiling through GC-MS**

434 Leaf (all the leaflets) and roots of *P. indica* colonized *S. lycopersicum* (40dpi) and *P. indica*  
435 mycelia were harvested and lyophilized. Three biological replicate, which was a pool of three  
436 individual samples were taken for each analysis. Lyophilized samples were extracted and  
437 derivatized for GC-MS analysis according to Kundu et al., 2018. The derivatized samples were  
438 analyzed through gas chromatography-mass spectrometry (GC-MS) by a Shimadzu GC-MS-

439 QP2010TM coupled with an auto sampler-auto injector (AOC-20si). Chromatography was  
440 performed using an Rtx-5® capillary column (Restek Corporation, US) and helium as carrier  
441 gas. Peak integration and mass spectra analysis were done through GC-MS solution software  
442 (Shimadzu®). Derivatized metabolites were identified through aligning and matching the mass  
443 spectra with NIST14s spectral library. Normalization of each peak area was done by internal  
444 standard's (ribitol) peak area used in each sample. For some metabolites with multiple peaks,  
445 summation of the normalized peak area was considered after confirming the mass spectra as per  
446 the published protocol (Lisec et al., 2006). Venn diagram was generated in Venny 2.1  
447 (<https://bioinfogp.cnb.csic.es/tools/venny/>). Logarithmic values of normalized peak area and  
448 metabolite fold change were used for all multivariate statistical analysis considering FDR.  
449 Volcano plots were prepared in Origin 6.0 (<https://www.originlab.com/>) by using  $\text{Log}_{10}$  values of  
450 the fold change (FC), where  $\text{FC} > 1.5$  was taken as cut-off value and  $P < 0.05$  was taken as cut-off  
451 for significance. Pearson's correlation based clustered heat-map, PLS-DA, OPLS-DA, network  
452 analysis and pathway impact analysis were done by using MetaboAnalyst 4.0  
453 (<http://www.metaboanalyst.ca/>). Metabolite network analysis was done by significantly altered  
454 metabolite fold changes and pathways were selected those have significance  $P < 0.05$ . Correlation  
455 network was constructed by Cytoscape 3.2.0 aided with MetScape by uploading correlation  
456 values calculated in correlation algorithm of MetaboAnalyst 4.0.

#### 457 **Putrescine quantification through LC-MS/MS**

458 Extraction and derivatization through benzylation of putrescine was done according to Lou et  
459 al., 2016 with slight modification. In brief, around 200-250 mg of fresh plant sample was ground  
460 in liquid nitrogen and extracted with 1 mL of 10% perchloric acid. The extract was centrifuged at  
461 12000 g for 10 min at 4°C. Supernatant was collected and 500 µL of supernatant was derivatized  
462 with 500 µL of 2N sodium hydroxide and 20 µL of benzoyl chloride by incubating the mixture at  
463 48°C for 20 min. 1 mL of sodium chloride was added to the sample and extracted with 1 mL of  
464 diethylether. Centrifugation was done at 5000 g for 10 min and the upper phase of the sample  
465 was collected and evaporated to dryness. The dried derivatized sample was again dissolved in  
466 500 µL of 50% acetonitrile. This sample was diluted (1:1000, v/v) with 50% acetonitrile before  
467 analyzing it in LC-MS/MS. Derivatized putrescine was analyzed in Exion LC (SCIEX) coupled  
468 with triple-quadruple-trap MS/MS equipped with a Turbospray ion source (SCIEX 6500+).



469 Chromatography was performed on a Zorbax Eclipse XDB-C<sub>18</sub> column (50 × 4.6 mm, 1.8 μm,  
470 Agilent Technologies) by using 1% formic acid (solvent A) and acetonitrile (solvent B) as  
471 mobile phase. A linear gradient (0-1 min, 5% B; 1-7 min, 5-95% B; 7-7.6 min, 95-5% B; 7.6-9  
472 min, 5% B) was applied for derivatized putrescine separation. For detection, the mass  
473 spectrometer was operated in MRM mode to monitor analyte parent ion → product ion  
474 (297.0→105). Settings were as follows: ion spray voltage, 5500 eV; turbo gas temperature,  
475 650°C; nebulizing gas, 70 p.s.i.; curtain gas, 45 p.s.i.; heating gas, 60 p.s.i.; DP, 60; EP,10; CE,  
476 20; CXP,10. Quantification was done by using external calibration curve prepared with authentic  
477 putrescine standard (Sigma®).

### 478 **Growth phytohormone estimation**

479 250 mg of *S. lycopersicum* seedlings were ground in liquid nitrogen and extracted with 1 mL of  
480 cold extraction buffer (MeOH: H<sub>2</sub>O:HCOOH, 15:4:0.1) containing 25 ng of *trans*-[<sup>2</sup>H<sub>5</sub>] zeatin,  
481 *trans*-[<sup>2</sup>H<sub>5</sub>] zeatin riboside, [<sup>2</sup>H<sub>6</sub>] N<sup>6</sup>-isopentenyladenine, [<sup>2</sup>H<sub>5</sub>]-indole-3-acetic acid (<sup>2</sup>H<sub>5</sub>-IAA)  
482 and [<sup>2</sup>H<sub>2</sub>]-GA<sub>1</sub> as internal standards. Homogenized sample was centrifuged at 10,000 g for 10  
483 min at 4°C. Supernatant was loaded onto a Strata-X (Phenomenex ®) C<sub>18</sub> solid phase extraction  
484 (SPE) column pre-conditioned with 1 mL of methanol and 1 mL of 0.1% formic acid in water.  
485 After loading, the SPE column was washed twice with 0.1% formic acid and 5% methanol.  
486 Finally, the elution was done with 1 mL 0.1% formic acid in acetonitrile and dried in speed-vac.  
487 Dried sample was re-dissolved in 100 μL 5% methanol and analyzed by liquid chromatography  
488 coupled with a SCIEX 6500<sup>+</sup> triple-quadrupole-trap MS/MS. LC-MS/MS was performed  
489 according to (Schäfer *et al.*, 2013) with slight modifications. In brief, separation of  
490 phytohormone was done with a Zorbax Eclipse XDB C<sub>18</sub> column (50 × 4.6 mm, 1.8 μm, Agilent  
491 Technologies) was used. The mobile phase comprised solvent A (water, 0.05% formic acid) and  
492 solvent B (acetonitrile) with the following elution profile: 0-0.5 min, 95% A; 0.5-5 min, 5-31.5%  
493 B in A; 5.01-6.5 min 100% B and 6.51-9 min 95% A, with a flow rate of 1.1 mL min<sup>-1</sup>. The  
494 column temperature was maintained at 25°C. For detection of IAA and cytokinins, the mass  
495 spectrometer was operated in positive ionization mode (MRM modus) to monitor analyte parent  
496 ion → product ion (176.0→130.0 for IAA; 220.2→136.3 for *trans*-zeatin; 352.2→220.3 for  
497 *trans*-zeatine riboside, 354.2→222.1 for dihydrozeatin riboside, 514.1→382.1 for *trans*-zeatin  
498 riboside-O-glucoside, 382.1→220.19 for *trans*-zeatin-7-glucoside, 222→136 for dihydrozeatin,

499 516.2→222 for dihydrozeatin riboside-*O*-glucoside, 384.2→222 dihydrozeatin-*O*-glucoside,  
500 225.2→136.3 for *trans*-[<sup>2</sup>H<sub>5</sub>]zeatin; *trans*-[<sup>2</sup>H<sub>5</sub>]zeatin riboside, 204.1→136 for  
501 isopentenyladenine, 210.1→136 for [<sup>2</sup>H<sub>6</sub>] N<sup>6</sup>-isopentenyladenine, 181.0→134.0 for [<sup>2</sup>H<sub>5</sub>]-IAA).  
502 Settings were as follows: ion spray voltage, 5500 eV; turbo gas temperature, 650°C; nebulizing  
503 gas, 70 p.s.i.; curtain gas, 45 p.s.i.; heating gas, 60 p.s.i. Analyst 1.5 software (Applied  
504 Biosystems) was used for data acquisition and processing. For detection of GAs, MS analysis  
505 triple Quad 6500+ is operated in negative ionization mode with Ion Spray Voltage of -4500 eV,  
506 CUR gas 45 psi, CAD- medium, Temperature 650, GS1 and GS2 60 psi. Multiple-reaction  
507 monitoring (MRM) is used to monitor analyte parent ion → product ion (331.1→213.1 for  
508 GA<sub>4</sub>, 345.1→143.1 for GA<sub>3</sub>, 347.1→273.1 for GA<sub>1</sub>, 329.1→223.1 for GA<sub>7</sub>, 363.1→275.1 for  
509 GA<sub>8</sub> and 349.0→276.0 for [<sup>2</sup>H<sub>2</sub>]GA<sub>1</sub>) with detection window of 60 seconds.

#### 510 **Preparation of virus induced gene silencing (VIGS) construct for *SIADC1* gene silencing**

511 To knock-down the expression of *ADC* in *Solanum lycopersicum*, the TRV-VIGS technique was  
512 used as previously reported (Lee *et al.*, 2017). The sequence of *SIADC1* gene (2124 bp) was  
513 obtained from the genome version: *Solanum lycopersicum* ITAG V3.2. For the *SIADC1*-VIGS  
514 silencing construct, a short sequence corresponding to 101 bp to 476 bp in the CDS sense strand  
515 was selected by SGN-VIGS TOOL ([vigs.solgenomics.net/](http://vigs.solgenomics.net/)). The 375 bp short sequence was  
516 amplified and cloned in the TRV2 vector. Details of the primer pair is provided in Table S1. The  
517 silencing ability of the TRV2 vector was confirmed by the knock down of *Phytoene Desaturase*  
518 gene (*PDS*) gene responsible for chlorophyll biosynthesis in *S. lycopersicum*. The positive  
519 plasmids for TRV2: *SIADC* was confirmed by sequencing and transformed in the *Agrobacterium*  
520 *tumefaciens* strain *GV3101*. VIGS in *S. lycopersicum* was carried out as described (Senthil-  
521 Kumar and Mysore, 2014) with slight modifications by the method of needleless syringe  
522 inoculation (Ryu *et al.*, 2004). Briefly, pTRV1, pTRV2 and pTRV2-*SIADC1* constructs were  
523 grown till OD<sub>600</sub>=1.0 separately and mixed to 1:1 ratio before infiltration to the abaxial leaf  
524 surface of 14 days old plants with a 1 ml needle-less syringe for two independent sets of plants  
525 (TRV:00, and TRV-*SIADC1*) and were maintained in a plant growth room at 26°C (day/night:  
526 16/8 h). At 7 and 14 days post infiltration (dpi), the infiltrated leaves were harvested for RNA  
527 isolation and cDNA synthesis. The relative transcript abundance of the *ADC1* gene was  
528 analyzed. For *P. indica*-tomato experiments, 14 days old plants post germination was co-  
529 cultivated with *P. indica* spores by applying 1 ml of spore suspension at a concentration of 5 x

530  $10^5$  spores/ml at the crown region of the plant in soilrite simultaneously during agro-  
531 inoculation and were allowed to grow for 40 days.

### 532 **RNA extraction and gene expressions analysis**

533 Harvested plant samples were homogenized using liquid N<sub>2</sub> and total RNA was extracted using  
534 TRIzol Reagent (Invitrogen). Extracted RNA was treated with DNase (TURBO DNase, Ambion)  
535 to remove DNA contamination, and its quantification was done using Nano Drop. cDNA was  
536 prepared by using High capacity cDNA reverse transcriptase kit (Applied Biosystems®). Gene  
537 sequences were availed from Sol Genomics Network (<https://solgenomics.net/>), and gene-  
538 specific primers were designed using NCBI primer designing tool  
539 (<https://www.ncbi.nlm.nih.gov/tools/primer-blast/>). PowerUp™ SYBR green Master Mix  
540 (Applied Biosystems®) was used for the generation of amplicon. qRT-PCR was performed on a  
541 Bio-Rad CFX connect Real Time PCR . Relative expressions of the genes in the treated samples  
542 were calculated as fold change relative to untreated samples. Normalization of the gene  
543 expression was done with ubiquitin (*UBI3*) expression. The primer pairs used in the gene  
544 expression studies are given in Table S1.

### 545 **Putrescine and DFMA treatment on *P. indica* and plants**

546 For examining the effect of putrescine on *P. indica* growth in axenic culture, five different  
547 concentrations (5, 10, 20, 50 and 100 μM) of putrescine (Sigma®) was directly supplemented to  
548 fungal defined minimal medium (MN medium) (Jogawat *et al.*, 2016) and the fungus was  
549 allowed to grow at 28±2°C in the incubator. After 2 weeks, fungal radial growth and fresh weight  
550 was measured. Five-day-old seedlings of *S. lycopersicum* and *A. thaliana* grown in sterile  
551 conditions were transferred to solid half MS plates with 10 μM of putrescine and allowed to  
552 grow for 21 days. In a separate experiments five-day-old *S. lycopersicum* seedlings were  
553 transferred to half MS with the arginine decarboxylase inhibitor, DL-α-(Difluoromethyl) arginine  
554 (DFMA) (Santa Cruz Biotechnology ®) of 200 nM concentration and allowed to grow for 21  
555 days.

### 556 **Statistical analysis**

557 Significance analysis (T-test and One-way ANOVA) was done by using ‘Sigma Plot’, version 13  
558 ([www.sigmaplot.com](http://www.sigmaplot.com)). Plots of the figures were generated by using Origin 6.0

559 (www.originlab.com). Pearson correlation co-efficient was calculated by using ‘Social Science  
560 Statistics’ (<https://www.socscistatistics.com/tests/pearson/>) online tool and MetaboAnalyst 4.0.

## 561 **Acknowledgements**

562 We acknowledge Department of Biotechnology (DBT), India for NIPGR core grant, and Max  
563 Planck-India partner group program of the Max Planck Society (Germany) for funding this work.  
564 We acknowledge JNU advanced instrumentation facility (AIRF) for GC-MS, NIPGR  
565 Metabolome facility funded by DBT (BT/ INF/22/SP28268/2018) for phytohormone  
566 quantification and LC-MS/MS analysis, Khushboo Adhlaka (Sciex, Gurgaon) for help in LC-  
567 MS/MS methods. We acknowledge NIPGR central instrumentation and phytotron facility and  
568 DBT-eLibrary Consortium (DeLCON) for providing access to e-resources. We also  
569 acknowledge Dr. Senthil Kumar Muthappa (NIPGR), New Delhi for providing VIGS vectors.

570

## 571 **Figure legends**

572 **Figure 1.** Effect of *P. indica* (Pi) treatment on phenotype of tomato (*S. lycopersicum*) plants in a  
573 time course (A) Representative *S. lycopersicum* shoot growth in non-inoculated (left tray) and *P.*  
574 *indica* inoculated (right tray) pots. The experiment was conducted for three independent times.  
575 (B) GFP-labeled *P. indica* colonization pattern after 40 dpi in tomato root; (left) fluorescence,  
576 (middle) bright field, (right) merged image. Red and white arrows indicate *P. indica*  
577 chlamydospores and mycelia respectively. (C) Mean of shoot fresh weight  $\pm$  S.E. (n = 10) at  
578 different time points after upon *P. indica* inoculation. (D) Quantification of root growth upon 30  
579 dpi and 40 dpi of *P. indica* inoculation (n = 10). (E) Visualization of root growth upon 40 days of  
580 *P. indica* inoculation. The figure is the best representative of three independent experimental sets.  
581 (F) Quantification of *P. indica* colonization (n = 4) in roots after 30 dpi and 40 dpi of inoculation.  
582 0 dpi denotes first day of inoculation. Relative fungal colonization was measured by subtracting  
583 the  $C_T$  values of *P. indica Tef1* from  $C_T$  values of tomato *UBI3* gene. Significance analysis was  
584 done by unpaired *t*-test; \* $P < 0.05$ , \*\* $P < 0.01$ , \*\*\* $P < 0.001$ , \*\*\*\* $P < 0.0001$

585

586 **Figure 2.** Alteration of annotated metabolites in tomato leaf, root and *P. indica* mycelia. (A)  
587 Mean of total number of GC-MS mass signals (n = 3, each replicate is the pool of three

588 individual plants) compared to number of identified and annotated metabolites detected in leaf  
589 and root (control and *P. indica* treated) of tomato and *P. indica* mycelia. (B) Venn diagram to  
590 show comparative metabolite profile and number of specific and common metabolites detected  
591 in leaf, root and *P. indica* mycelia. (C) Heat map with Pearson's correlation based clustering  
592 (algorithm: complete) of Log<sub>2</sub> fold change of 45 common metabolites in *S. lycopersicum* root and  
593 leaf. Scale shows change values. Heat map was generated in MetaboAnalyst 4.0. (D) Pearson  
594 correlation network in between root and leaf (n = 3) on the basis of Log<sub>2</sub> fold change values of  
595 the 45 common metabolites in leaf and roots. Nodes represent leaves and roots, edges represent  
596 correlations (blue: negative correlation; red positive correlation); thickness of the edges  
597 represents correlation strength. Pearson correlations was calculated in MetaboAnalyst correlation  
598 algorithm and the network is generated in Cytoscape 3.2.1 aided with MetScape.

599

600 **Figure 3.** Analysis of differential alteration of root metabolite (A) PLS-DA score plot of control  
601 and *P. indica* treated root samples on the basis of 77 metabolite's normalized peak areas. (B) VIP  
602 (variables of importance) score plot shows top fifteen variables (metabolites) of importance in  
603 the root. Red arrow indicates putrescine with highest VIP score. (C) Volcano plot shows up-  
604 regulation (Red) of eight metabolites and down regulation (Blue) of eight metabolites in root.  
605 Point denoted as 1' shows maximum up-regulated putrescine and 9' shows maximum down  
606 regulated benzoic acid. Numbering of the denoted metabolites are described in figure S5.(D)  
607 Comparative LC-MS/MS XIC showing putrescine (Q1-Q3: m/z 297-176) peaks in root and  
608 mycelia. (E) Metabolite-metabolite interaction network constructed with the fold change values  
609 of significantly altered root metabolites, which predicted 404 plausible nodes (metabolites) and  
610 830 plausible edges (interactions). (F) Zoomed view of interaction network in between up-  
611 regulated and down-regulated metabolites. (G) Correlation network of interacting upregulated  
612 and down regulated metabolites with putrescine. (H) Mean ± SE of absolute amount of  
613 putrescine in control and *P. indica* colonized *S. lycopersicum* roots after 40 dpi. Significance  
614 analysis was done by unpaired *t*-test; \**P*<0.05, \*\**P*<0.01, \*\*\**P*<0.005

615 **Figure 4.** Effect of exogenous putrescine on *P. indica* and *S. lycopersicum* growth and alteration  
616 of putrescine biosynthetic genes in *S. lycopersicum* upon *P. indica* (*Pi*) colonization. (A) Mean ±  
617 SE of arginine decarboxylase (*SIADC*) and ornithine decarboxylase (*SIODC*) transcript levels  
618 after 40 dpi of *P. indica* inoculation (n = 4). Controls of *SIADC1* and *SIADC2* has error bars

619 merged with the bar's out line as they have small values. (B) Quantification of radial growth of  
620 *P. indica* upon 10  $\mu$ M putrescine treatment (n = 10). Inset shows the visualization of the radial  
621 growth. (C) Visualization of phenotype of growth in *S. lycopersicum* seedlings upon 10  $\mu$ M  
622 putrescine treatment. Scale bar: ~4.5 cm. The figure is the representative of 10 replicates.  
623 Quantification of (D) shoot fresh weight and (E) root fresh weight of *S. lycopersicum* and  
624 visualization of root growth upon 10  $\mu$ M putrescine treatment (n = 10). Scale bar: ~4 cm. (F)  
625 Fresh weight of *S. lycopersicum* seedlings upon 10  $\mu$ M Gluconic Acid (GlucA) and 10  $\mu$ M  
626 Putrescine (Put) Treatment. Significance analysis was done by unpaired *t*-test; \**P*<0.05,  
627 \*\**P*<0.01, \*\*\**P*<0.001, \*\*\*\**P*<0.0001.

628 **Figure 5.** Effect of exogenous putrescine on growth phytohormone levels in *S. lycopersicum*. (A)  
629 Mean  $\pm$  SE (n = 4) of indole-3-acetic acid (IAA) (B) Mean  $\pm$  SE (n = 4) of gibberellins (GA<sub>1</sub>,  
630 GA<sub>3</sub>, GA<sub>4</sub>, GA<sub>7</sub> and GA<sub>8</sub>) and (C) Mean  $\pm$  SE (n = 4) of different cytokinins in control and 10  
631  $\mu$ M putrescine treated *S. lycopersicum* seedlings. tZ, *trans*-zeatin; tZR, *trans*-zeatin riboside;  
632 DHZR, dihydrozeatin riboside; tZROG, *trans*-zeatin riboside-*O*-glucoside; tZ7G, *trans*-zeatin-7-  
633 glucoside; DHZ, dihydrozeatin; DHZROG, dihydrozeatin riboside-*O*-glucoside; DHZOG,  
634 dihydrozeatin-*O*-glucoside; iP, isopentenyladenine.

635  
636 **Figure 6.** *P. indica* mediated growth in *S. lycopersicum* *adc1*-VIGS plants. (A) Mean + SE of  
637 arginine decarboxylase (ADC1) transcript levels in EV and *adc*-VIGS *S. lycopersicum* after 7 dpi  
638 and 14 dpi (n = 4). Silencing efficiency at 7 dpi is 97.41% and at 14 dpi is 85.93%. (B) Mean  $\pm$   
639 SE of putrescine content in EV and *Sladc1*-VIGS plants (n = 4). Significance analysis was done  
640 by unpaired *t*-test; \**P*<0.05, \*\**P*<0.01, \*\*\**P*<0.001. Quantification of the (C) root fresh weight  
641 (n = 10) and (D) shoot fresh weight (n = 8-10) in EV and *Sladc1*-VIGS. Significance analysis  
642 was done by analysis of variance (ANOVA) followed by Tukey's test. Different letters denoted  
643 significant differences. (E) Visualization of phenotypic changes and growth promotion of EV and  
644 *adc1*-VIGS plants after 40 dpi of *P. indica* infestation. This figure is a representative of 8-10  
645 biological replicates of each of the plants.

646  
647 **Figure 7.** Effect of putrescine on Arabidopsis growth (A) Representative figure of 14 days old  
648 Arabidopsis seedlings treated with 10  $\mu$ M putrescine (n=12) (B) Quantification of fresh weight  
649 of seven days old Arabidopsis seedlings upon 10 $\mu$ M putrescine treatment (n = 12). Significant

650 analysis was done by unpaired t-test (\*\*\*\* $P < 0.0001$ ). (C) Growth promotion assay in putrescine  
651 biosynthetic mutants along with gain-of-function assay by putrescine supplementation. Mean  $\pm$   
652 SE (n = 22 - 30). Significance analysis was done by ANOVA (\* $P < 0.05$ ). (D) Representative  
653 figure of 22-30 biological replicates of putrescine induced *P. indica* mediated growth promotion  
654 assay in two *adc* mutant lines of Arabidopsis (14 days old). Scale bar: 0.4 cm. The seedlings  
655 were transferred from plates to a black surface for photograph

656 **Figure 8.** Schematic representation of *P. indica* induced putrescine biosynthesis in plants that  
657 promotes the growth of both plants and *P. indica*. *P. indica* realigns cellular metabolism and  
658 induces arginine decarboxylase (ADC) mediated putrescine biosynthesis. The other putrescine  
659 biosynthetic pathway mediated by ornithine decarboxylase (ODC) is not induced by *P. indica*.  
660 The increased biosynthesis of putrescine induces IAA and GAs which promotes growth in plants.  
661 Induced putrescine level also helps in *P. indica* growth.

662

### 663 **Brief Legends for Supplemental Figures**

664 **Supplemental Fig. S1** - Trypan blue staining shows *P. indica* colonization in *S. lycopersicum*  
665 root after 10 days of co-cultivation.

666 **Supplemental Fig. S2** - Different phenotypic changes and growth induction of *S. lycopersicum*  
667 upon *P. indica* colonization.

668 **Supplemental Fig. S3** – Pearson's correlation of metabolite alteration in leaf and root.

669 **Supplemental Fig. S4** - Alteration of leaf metabolites in *S. lycopersicum* upon *P. indica*  
670 treatment.

671 **Supplemental Fig. S5** – *S. Lycopersicum* root metabolites alteration upon *P. indica* colonization  
672 (40 dpi).

673 **Supplemental Fig. S6** - Scatter plot of pathway impact in root shows specific metabolism in root  
674 affected by *P. indica* colonization.

675 **Supplemental Fig. S7** - Effect of 10  $\mu$ M putrescine on growth of *S. lycopersicum*.

676 **Supplemental Fig. S8** - Effect of Putrescine on *P. indica*

677 **Supplemental Fig. S9** - Schematic representation of the VIGS protocol in *Solanum*  
678 *lycopersicum*.

679 **Supplemental Fig. S10** - VIGS confirmation in *S. lycopersicum*.

680 **Supplemental Fig. S11-** *S. lycopersicum* and *P. indica* growth assay growth assay upon DL- $\alpha$ -  
681 (Difluoromethyl) arginine (DFMA) treatment.

682 **Supplemental Fig. S12-** Importance of putrescine on shoot and root growth of *A. thaliana*  
683 during *P. indica* infestation.

#### 684 **Tables**

685 **Supplemental Table S1.** Primer list.

686 **Supplemental Table S2.** Annotated metabolites in tomato and *P. indica* mycelia with  
687 derivatization level and obtained molecular mass.

688 **Supplemental Table S3.** Identity of metabolites distributed in Venn's Diagram.

689 **Supplemental Table S4.** Fold change of metabolites found both in control and treated leaf and  
690 root samples.

691 **Supplemental Table S5.** Pathway impact analysis table for *S. lycopersicum* root treated with *P.*  
692 *indica*.

693 **Supplemental Table S6.** Metabolite-metabolite interaction analysis output.

694

695

#### 696 **Literature cited**

697 **Abdelaziz ME, Abdelsattar M, Abdeldaym EA, Atia M, Mahmoud AW, Saad MM, Hirt H**  
698 **(2019)** *Piriformospora indica* alters Na<sup>+</sup>/K<sup>+</sup> homeostasis, antioxidant enzymes and LeNHX1  
699 expression of greenhouse tomato grown under salt stress. *Scientia Horticulturae* **256**: 1-8

700 **Acosta C, Pérez Amador MA, Carbonell J, Granell A** (2005) The two ways to produce  
701 putrescine in tomato are cell-specific during normal development. *Plant Sci* **168**: 1053-1057.

702 **Alcázar R, Garcia-Martinez JL, Cuevas JC, Tiburcio AF, Altabella T** (2005)  
703 Overexpression of *ADC2* in *Arabidopsis* induces dwarfism and late flowering through GA  
704 deficiency. *Plant J* **43**: 425-436.

705 **Alcázar R, Planas J, Saxena T, Zarza X, Bortolotti C, Cuevas J, Bitrián M, Tiburcio AF,**  
706 **Altabella T** (2010) Putrescine accumulation confers drought tolerance in transgenic *Arabidopsis*  
707 plants over-expressing the homologous Arginine decarboxylase 2 gene. *Plant Physiol. Biochemi*  
708 **48**: 547-552.



- 709 **Alikhani M, Khatabi B, Sepehri M, Nekouei MK, Mardi M., Salekdeh GH** (2013) A  
710 proteomics approach to study the molecular basis of enhanced salt tolerance in barley (*Hordeum*  
711 *vulgare* L.) conferred by the root mutualistic fungus *Piriformospora indica*. *Mol Biosyst* **9**:  
712 1498-1510.
- 713 **Alonso JM, Stepanova AN, Leisse TJ, Kim CJ, Chen H, Shinn P, Stevenson DK,**  
714 **Zimmerman J, Barajas P, Cheuk R et al.** (2003) Genome-wide insertional mutagenesis of  
715 *Arabidopsis thaliana*. *Science* **301**: 653-657
- 716 **Bais H, Sudha G, Ravishankar G** (2001) Influence of putrescine, silver nitrate and polyamine  
717 inhibitors on the morphogenetic response in untransformed and transformed tissues of *Cichorium*  
718 *intybus* and their regenerants. *Plant Cell Rep* **20**: 547-555.
- 719 **Bakshi M, Sherameti I, Meichsner D, Thürich J, Varma A, Johri AK, Yeh KW Oelmüller,**  
720 **R** (2017) *Piriformospora indica* reprograms gene expression in *Arabidopsis* phosphate  
721 metabolism mutants but does not compensate for phosphate limitation. *Front Microbiol* **8**:1262.
- 722 **Baltruschat H, Fodor J, Harrach BD, Niemczyk E, Barna, B, Gullner G, Janeczko A, Kogel**  
723 **KH, Schäfer P, Schwarczinger I. Zuccaro A** (2008) Salt tolerance of barley induced by the  
724 root endophyte *Piriformospora indica* is associated with a strong increase in antioxidants. *New*  
725 *Phytol* **180**: 501-510.
- 726 **Besserer A, Puech-Pagès V, Kiefer P, Gomez-Roldan V, Jauneau A, Roy S, Portais JC,**  
727 **Roux C, Bécard G, Séjalon-Delmas N** (2006) Strigolactones stimulate arbuscular mycorrhizal  
728 fungi by activating mitochondria. *PLoS Biol* **4**:e226.
- 729 **Bütehorn B, Rhody D, Franken P** (2000) Isolation and characterisation of *Pitefl* encoding the  
730 translation elongation factor EF-1 $\alpha$  of the root endophyte *Piriformospora indica*. *Plant Biol* **2**:  
731 687-692.
- 732 **Capell T, Bassie L, Christou P** (2004) Modulation of the polyamine biosynthetic pathway in  
733 transgenic rice confers tolerance to drought stress. *Proc Natl Acad Sci USA* **101**: 9909-9914.
- 734 **Chen D, Shao Q, Yin, L, Younis, A, Zheng, B** (2019) Polyamine function in plants:  
735 metabolism, regulation on development, and roles in abiotic stress responses. *Front Plant Sci*  
736 **9**:1945

- 737 **Cosme M, Lu J, Erb M, Stout M J, Franken P, Wurst S** (2016) A fungal endophyte helps  
738 plants to tolerate root herbivory through changes in gibberellin and jasmonate signaling. *New*  
739 *Phytol* **211**: 1065-1076.
- 740 **Cuevas JC, Lopez-Cobollo R, Alcázar R, Zarza X, Koncz C, Altabella T, Salinas J,**  
741 **Tiburcio AF, Ferrando A** (2008) Putrescine is involved in Arabidopsis freezing tolerance and  
742 cold acclimation by regulating abscisic acid levels in response to low temperature. *Plant Physiol*  
743 **148**: 1094-1105.
- 744 **Dickson S, Mandeep Smith SM** (1998) Evaluation of vesicular arbuscular mycorrhizal  
745 colonization by staining. In: Varma A, eds. *Mycorrhiza Manual*. Springer-Verlag, Berlin. 77-84.
- 746 **Dong S, Tian Z, Chen P J, Senthil Kumar R, Shen CH, Cai D, Oelmüller R, Yeh KW**  
747 (2013) The maturation zone is an important target of *Piriformospora indica* in Chinese cabbage  
748 roots. *J Exp Bot* **64**: 4529-4540.
- 749 **Fakhro A, Andrade-Linares DR, von Barga S, Bandte M, Büttner C, Grosch R, Schwarz**  
750 **D, Franken P** (2010) Impact of *Piriformospora indica* on tomato growth and on interaction with  
751 fungal and viral pathogens. *Mycorrhiza* **20**: 191-200.
- 752 **Fernández-Crespo E, Scalschi L, Llorens E, García-Agustín P, Camañes G** (2015)  $\text{NH}_4^+$   
753 protects tomato plants against *Pseudomonas syringae* by activation of systemic acquired  
754 acclimation. *J Exp Bot* **66**: 6777-6790.
- 755 **Ghabooli M, Khatabi B, Ahmadi FS, Sepehri M, Mirzaei M, Amirkhani A, Jorrín-Novo**  
756 **JV, Salekdeh GH** (2013) Proteomics study reveals the molecular mechanisms underlying water  
757 stress tolerance induced by *Piriformospora indica* in barley. *Journal of Proteomics* **94**: 289-301.
- 758 **Ghachtouli NE, Paynot M, Martin-Tanguy J, Morandi D, Gianinazzi S** (1996) Effect of  
759 polyamines and polyamine biosynthesis inhibitors on spore germination and hyphal growth of  
760 *Glomus mosseae*. *Mycol Res* **100**: 597-600.
- 761 **Hilbert M, Voll LM, Ding Y, Hofmann J, Sharma M, Zuccaro A** (2012) Indole derivative  
762 production by the root endophyte *Piriformospora indica* is not required for growth promotion but  
763 for biotrophic colonization of barley roots. *New Phytol* **196**: 520534.

- 764 **Hua MDS, Kumar RS, Shyur LF, Cheng YB, Tian Z, Oelmüller R, Yeh KW (2017)**  
765 **Metabolomic compounds identified in Piriformospora indica-colonized Chinese cabbage roots**  
766 **delineate symbiotic functions of the interaction. Sci Rep 7: 9291.**
- 767 **Imai A, Matsuyama T, Hanzawa Y, Akiyama T, Tamaoki M, Saji H, Shirano Y, Kato T,**  
768 **Hayashi H, Shibata D, Tabata S, Komeda Y, Takahashi T (2004) Spermidine synthase genes**  
769 **are essential for survival of Arabidopsis. Plant Physiol 135: 1565-1573.**
- 770 **Jacobs S, Zechmann B, Molitor A, Trujillo M, Petutschnig E, Lipka V, Kogel KH, Schäfer**  
771 **P (2011) Broad spectrum suppression of innate immunity is required for colonization of**  
772 **Arabidopsis thaliana roots by the fungus Piriformospora indica. Plant Physiol 126: 726-740.**
- 773 **Jogawat A, Vadassery J, Verma N, Oelmüller R, Dua M, Nevo E and Johri AK (2016)**  
774 **PiHOG1, a stress regulator MAP kinase from the root endophyte fungus Piriformospora indica,**  
775 **confers salinity stress tolerance in rice plants. Sci Rep 6: 36765.**
- 776 **Jogawat A, Meena MK, Kundu A, Varma M, Vadassery J (2020) Calcium channel CNGC19**  
777 **mediates basal defense signaling to regulate colonization by Piriformospora indica on**  
778 **Arabidopsis roots. J Exp Bot 71: 2752-2768.**
- 779
- 780 **Johnson JM, Sherameti I, Nongbri PL, Oelmüller R (2013) Standardized conditions to study**  
781 **beneficial and nonbeneficial traits in the Piriformospora indica/Arabidopsis thaliana interaction.**  
782 **In A Varma, G Kost, R Oelmüller, eds, Piriformospora indica: Sebaciales and Their**  
783 **Biotechnological Applications. Soil Biology, vol 33, Springer, Berlin, Heidelberg**
- 784
- 785 **Johnson JM, Thurich J, Petutschnig EK, Altschmied L, Meichsner D, Sherameti I, Dindas**  
786 **J, Mrozinska A, Paetz C, Scholz SS, Furch ACU, Lipka V, Hedrich R, Schneider B, Svatos**  
787 **A, Oelmüller R (2018) A poly(A) ribonuclease controls the celotriose-based interaction**  
788 **between Piriformospora indica and its host Arabidopsis. Plant Physiol 176: 2496-2514**
- 789
- 790 **Kao CW, Bakshi M, Sherameti I, Dong S, Reichelt M, Oelmüller R, Yeh KW (2016) A**  
791 **Chinese cabbage (Brassica campestris subsp. Chinensis)  $\tau$ -type glutathione-S-transferase**  
792 **stimulates Arabidopsis development and primes against abiotic and biotic stress. Plant Mol Biol**  
793 **92: 643-659.**

- 794 **Knott JM, Römer P, Sumper M (2007)** Putative spermine synthases from *Thalassiosira*  
795 *pseudonana* and *Arabidopsis thaliana* synthesize thermospermine rather than spermine. *FEBS*  
796 *Lett* **581**:3081-3086
- 797 **Kumria R, Rajam MV (2002)** Ornithine decarboxylase transgene in tobacco affects  
798 polyamines, in vitro morphogenesis and response to salt stress. *J Plant Physiol* **159**: 983-990.
- 799 **Kundu A, Mishra S, Vadassery J (2018)** *Spodoptera litura*-mediated chemical defense is  
800 differentially modulated in older and younger systemic leaves of *Solanum lycopersicum*. *Planta*  
801 **248**: 981-997.
- 802 **Kusano T, Berberich T, Tateda C, Takahashi Y (2008)** Polyamines: essential factors for  
803 growth and survival. *Planta* **228**: 367-381.
- 804 **Kwak SH, Lee SH (2001)** The regulation of ornithine decarboxylase gene expression by sucrose  
805 and small upstream open reading frame in tomato (*Lycopersicon esculentum* Mill). *Plant Cell*  
806 *Physiol* **42**: 14-323.
- 807 **Lahrman U, Strehmel N, Langen G, Frerigmann H, Leson L, Ding Y, Scheel D, Herklotz**  
808 **S, Hilbert M, Zuccaro A (2015)** Mutualistic root endophytism is not associated with the  
809 reduction of saprotrophic traits and requires a non-compromised plant innate immunity. *New*  
810 *Phytologist* **207**, 841–857.
- 811 **Lee S, Senthil-Kumar M, Kang M, Rojas CM, Tang Y, Oh S, Choudhury SR, Lee H-K,**  
812 **Ishiga Y, Allen RD (2017)** The small GTPase, nucleolar GTP-binding protein 1 (NOG1), has a  
813 novel role in plant innate immunity. *Sci Rep* **7**: 1-14.
- 814 **Lee Y C, Johnson J M, Chien C T, Sun C, Cai D, Lou B, Oelmüller R, Yeh KW (2011)**  
815 Growth promotion of Chinese cabbage and *Arabidopsis* by *Piriformospora indica* is not  
816 stimulated by mycelium-synthesized auxin. *Mol. Plant Microbe Interact* **24**: 421-431.
- 817 **Li Z, Li Y, Zhang Y, Cheng B, Peng Y, Zhang X, Ma X, Huang L, Yan Y (2018)** Indole-3-  
818 acetic acid modulates phytohormones and polyamines metabolism associated with the tolerance  
819 to water stress in white clover. *Plant Physiol Biochem* **129**: 251-263.
- 820 **Lisec J, Schauer N, Kopka J, Willmitzer L, Fernie AR (2006).** Gas chromatography mass  
821 spectrometry-based metabolite profiling in plants. *Nat. Protoc.* **1**: 387-396.

- 822 **Liu CW& Murray JD** (2016) The Role of Flavonoids in Nodulation Host-Range Specificity:  
823 An Update. *Plants* (Basel, Switzerland) **5**: 33.
- 824 **Liu T, Huang B, Chen L, Xian Z, Song S, Chen R, Hao Y** (2018) Genome-wide identification,  
825 phylogenetic analysis, and expression profiling of polyamine synthesis gene family members in  
826 tomato. *Gene* **661**: 1-10.
- 827 **Liu JH, Wang W, Wu H, Gong X, Moriguchi T** (2015) Polyamines function in stress  
828 tolerance: from synthesis to regulation. *Front Plant Sci* **6**: 827.
- 829 **Liu X, Zhang J, Ni F, Dong X, Han B, Han D, Ji Z, Zhao Y** (2010) Genome wide exploration  
830 of the origin and evolution of amino acids. *BMC Evol Biol* **10**:77.
- 831 **Liu Y, Gu D, Wu W, Ai E** (2013) The relationship between polyamines and hormones in the  
832 regulation of wheat grain. *Plos One* **8**: e78196.
- 833 **Lou Y-R, Bor M, Yan J, Preuss AS, Jander G** (2016) Arabidopsis NATA1 acetylates  
834 putrescine and decreases defense-related hydrogen peroxide accumulation. *Plant Physiol* **171**:  
835 1443-1455.
- 836 **Meents AK, Furch ACU, Almeida-Trapp M, Özyürek S, Scholz SS, Kirbis A, Lenser T,**  
837 **Theißen G, Grabe V, Hansson B, Mithöfer A, Oelmüller R** (2019) Beneficial and pathogenic  
838 Arabidopsis root-interacting fungi differently affect auxin levels and responsive genes during  
839 early infection. *Front Microbiol* **10**: 380.
- 840 **Martin-Tanguy J** (2001) Metabolism and function of polyamines in plants: recent development  
841 (new approaches). *Plant Growth Regul* **34**: 135–148.
- 842 **Minocha R, Majumdar R, Minocha SC** (2014) Polyamines and abiotic stress in plants: a  
843 complex relationship. *Front Plant Sci* **5**:175.
- 844 **Mo H, Wang X, Zhang Y, Zhang G, Zhang J, Ma Z** (2015) Cotton polyamine oxidase is  
845 required for spermine and camalexin signalling in the defence response to *Verticillium*  
846 *dahliae*. *Plant J* **83**: 962-975.
- 847 **Molitor A, Zajic D, Voll LM, Pons-Kühnemann J, Samans B, Kogel KH, Waller F** (2011)  
848 Barley leaf transcriptome and metabolite analysis reveals new aspects of compatibility and

849 *Piriformospora indica*-mediated systemic induced resistance to powdery mildew. Mol Plant  
850 Microbe Interact **24**: 1427-1439.

851 **Nahar K, Hasanuzzaman M, Alam MM, Fujita M** (2015a) Glutathione-induced drought stress  
852 tolerance in mung bean: coordinated roles of the antioxidant defence and  
853 methylglyoxal detoxification systems. AoB Plants **7**: plv069.

854 **Nahar K, Hasanuzzaman M, Alam MM, Fujita M** (2015b) Exogenous glutathione confers  
855 high temperature stress tolerance in mung bean (*Vigna radiata* L.) by modulating antioxidant  
856 defense and methylglyoxal detoxification system. Environ Exp Bot **112**: 44-54.

857 **Oldroyd GE** (2013) Speak, friend, and enter: signalling systems that promote beneficial  
858 symbiotic associations in plants. Nat Rev Microbiol **11**: 252–263

859 **Peipp H, Maier W, Schmidt J, Wray V, Strack D** (1997) Arbuscular mycorrhizal fungus-  
860 induced changes in the accumulation of secondary compounds in barley roots. Phytochemistry  
861 **44**: 581-587.

862 **Prasad D, Verma N, Bakshi M, Narayan OP, Singh AK, Dua M, Johri AK** (2019)  
863 Functional characterization of a magnesium transporter of root endophytic fungus  
864 *Piriformospora indica*. Front Microbiol **9**: 3231.

865 **Qiang X, Weiss M, Kogel KH, Schäfer P** (2012) *Piriformospora indica*—a mutualistic  
866 basidiomycete with an exceptionally large plant host range. Mol Plant Pathol **13**: 508-518.

867 **Rani M, Raj S, Dayaman V, Kumar M, Dua M, Johri AK** (2016) Functional Characterization  
868 of a Hexose Transporter from Root Endophyte *Piriformospora indica*. Front Microbiol **7**: 1083.

869 **Roy M, Wu, R** (2001) Arginine decarboxylase transgene expression and analysis of  
870 environmental stress tolerance in transgenic rice. Plant Sci **160**: 869-875.

871 **Ruiz-Herrera J** (1994) Polyamines, DNA methylation, and fungal differentiation. Crit Rev  
872 Microbiol **20**: 143-150.

873 **Ryu CM, Anand A, Kang L, Mysore KS** (2004) Agrodrench: a novel and effective  
874 agroinoculation method for virus-induced gene silencing in roots and diverse Solanaceous  
875 species. Plant J **40**: 322-331.

876 **Sarma MVRK, Kumar V, Saharan K, Srivastava R, Sharma AK, Prakash A, Sahai V,**  
877 **Bisaria VS** (2011) Application of inorganic carrier based formulations of fluorescent

- 878 pseudomonads and *Piriformospora indica* on tomato plants and evaluation of their efficacy. J  
879 Appl Microbiol **111**: 456-466.
- 880 **Saeed W, Naseem S, Goha D, Ali Z** (2019) Efficient and reproducible somatic embryogenesis  
881 and micropropagation in tomato via novel structures—Rhizoid Tubers. PLoS One **14**: e0215929.
- 882 **Schäfer P, Pfiffi S, Voll LM, Zajic D, Chandler PM, Waller F, Scholz U, Pons-Kühnemann**  
883 **J, Sonnewald S, Sonnewald U, Kogel KH** (2009) Manipulation of plant innate immunity and  
884 gibberellin as factor of compatibility in the mutualistic association of barley roots with  
885 *Piriformospora indica*. Plant J. **59**(3):461-74
- 886 **Schäfer M, Brütting C, Gase K, Reichelt M, Baldwin I, Meldau S** (2013) “Real time” genetic  
887 manipulation: A new tool for ecological field studies. Plant J **76**: 506-518.
- 888 **Seifi HS, Shelp BJ** (2019) Spermine Differentially Refines Plant Defense Responses Against  
889 Biotic and Abiotic Stresses. Front Plant Sci **10**:117.
- 890 **Senthil-Kumar M, Mysore KS** (2014) Tobacco rattle virus–based virus-induced gene silencing  
891 in *Nicotiana benthamiana*. Nat Protoc **9**: 1549.
- 892 **Sherameti I, Shahollari B, Venus Y, Altschmied L, Varma A, Oelmüller R** (2005) The  
893 endophytic fungus *Piriformospora indica* stimulates the expression of nitrate reductase and the  
894 starch-degrading enzyme glucan-water dikinase in tobacco and Arabidopsis roots through a  
895 homeodomain transcription factor that binds to a conserved motif in their promoters. J Biol  
896 Chem **280**: 26241-26247.
- 897 **Sirrenberg A, Göbel C, Grond S, Czempinski N, Ratzinger A, Karlovsky P, Santos P,**  
898 **Feussner I, Pawlowski K** (2007) *Piriformospora indica* affects plant growth by auxin  
899 production. Physiol Plant **131**: 581-589.
- 900 **Stein E, Molitor A, Kogel KH, Waller F** (2008) Systemic resistance in Arabidopsis conferred  
901 by the mycorrhizal fungus *Piriformospora indica* requires jasmonic acid signaling and the  
902 cytoplasmic function of NPR1. Plant Cell Physiol **49**: 1747-1751.
- 903 **Stevens L, Winther MD** (1979) Spermine, spermidine and putrescine in fungal development.  
904 Adv Microb Physiol **19**: 63-148.

- 905 **Strehmel N, Mönchgesang S, Herklotz S, Krüger S, Ziegler J, Scheel D** (2016)  
906 *Piriformospora indica* stimulates root metabolism of *Arabidopsis thaliana*. *Int J Mol Sci* **17**:  
907 1091.
- 908 **Sun C, Johnson JM, Cai D, Sherameti I, Oelmüller R, Lou B** (2010) *Piriformospora indica*  
909 confers drought tolerance in Chinese cabbage leaves by stimulating antioxidant enzymes, the  
910 expression of drought-related genes and the plastid-localized CAS protein. *J Plant Physiol* **167**:  
911 1009-1017.
- 912 **Takahashi T, Kakehi JI** (2010) Polyamines: ubiquitous polycations with unique roles in growth  
913 and stress responses. *Ann Bot* **105**: 1-6.
- 914 **Urano K, Yoshiba Y, Nanjo T, Ito T, Yamaguchi-Shinozaki K, Shinozaki K** (2004)  
915 *Arabidopsis* stress-inducible gene for arginine decarboxylase *AtADC2* is required for  
916 accumulation of putrescine in salt tolerance. *Biochem Biophys Res Commun* **313**: 369-375.
- 917 **Vadassery J, Ranf S, Drzewiecki C, Mithöfer A, Mazars C, Scheel D, Lee J, Oelmüller R**  
918 (2009) A cell wall extract from the endophytic fungus *Piriformospora indica* promotes growth of  
919 *Arabidopsis* seedlings and induces intracellular calcium elevation in roots. *Plant J* **59**: 193-206.
- 920 **Vadassery J, Ritter C, Venus Y, Iris Camehl, Ajit Varma, Bationa Shahollari, Ondřej**  
921 **Novák, Miroslav Strnad, Jutta Ludwig-Müller, Ralf Oelmüller** (2008) The role of auxins and  
922 cytokinins in the mutualistic interaction between *Arabidopsis* and *Piriformospora indica*. *Mol.*  
923 *Plant Microbe Interact* **21**: 1371-1383.
- 924 **Vahabi K, Reichelt M, Scholz SS, Furch ACU, Matsuo M, Johnson JM, Sherameti I,**  
925 **Gershenson J, Oelmüller R** (2018) *Alternaria Brassicae* Induces Systemic Jasmonate  
926 Responses in *Arabidopsis* Which Travel to Neighboring Plants via a *Piriformospora*  
927 *Indica* Hyphal Network and Activate Abscisic Acid Responses. *Front Plant Sci* **9**: 626.
- 928 **Vahabi K, Sherameti I, Bakshi M, Mrozinska A, Ludwig A, Reichelt M, Oelmüller R**  
929 (2015) The interaction of *Arabidopsis* with *Piriformospora indica* shifts from initial transient  
930 stress induced by fungus-released chemical mediators to a mutualistic interaction after physical  
931 contact of the two symbionts. *BMC Plant Biol* **15**: 58.



- 932 **Valette M, Rey M, Gerin F, Comte G, Wisniewski-Dyé F** (2019) A common metabolomic  
933 signature is observed upon inoculation of rice roots with various rhizobacteria. *J Integr Plant*  
934 *Biol* **62**: 228-46.
- 935 **Varma A, Verma S, Sahay N, Bütehorn B, Franken P** (1999) *Piriformospora indica*, a  
936 cultivable plant-growth-promoting root endophyte. *Appl Environ Microbiol* **65**: 2741-2744.
- 937 **Verma S, Varma A, Rexer KH, Hassel A, Kost G, Sarbhoy A, Bisen P, Bütehorn B,**  
938 **Franken P.** (1998) *Piriformospora indica*, gen. et sp. nov., a new root-colonizing fungus.  
939 *Mycologia* **90**: 896-903.
- 940 **Vuosku J, Suorsa M, Ruottinen M, Sutela S, Muilu-Mäkelä R, Julkunen-Tiitto R** (2012)  
941 Polyamine metabolism during exponential growth transition in Scots pine embryogenic cell  
942 culture. *Tree Physiol* **32**: 1274–1287.
- 943 **Waller F, Achatz B, Baltruschat H, Fodor J, Becker K, Fischer M, Heier T, Hückelhoven**  
944 **R, Neumann C, von Wettstein D, Franken P** (2005) The endophytic fungus *Piriformospora*  
945 *indica* reprograms barley to salt-stress tolerance, disease resistance, and higher yield. *Proc Natl*  
946 *Acad Sci USA* **102**: 13386-13391.
- 947 **Wang M, Schäfer M, Li D, Halitschke R, Dong C, McGale E, Paetz C, Song Y, Li S, Dong**  
948 **J, Heiling S, Groten K, Franken P, Bitterlich M, Harrison MJ, Paszkowski U, Baldwin IT**  
949 (2018) Blumenols as shoot markers for root symbiosis with arbuscular mycorrhizal fungi. *eLife*  
950 **7**: e37093.
- 951 **Xu L, Wu C, Oelmüller R, Zhang W** (2018) Role of phytohormones in *Piriformospora indica*-  
952 induced growth promotion and stress tolerance in plants: more questions than answers. *Front*  
953 *Microbiol.* **9**: 1646.
- 954 **Yadav V, Kumar M, Deep DK, Kumar H, Sharma R, Tripathi T, Tuteja N, Saxena AK,**  
955 **Johri AK** (2010) A phosphate transporter from the root endophytic fungus *Piriformospora*  
956 *indica* plays a role in the phosphate transport to the host plant. *J Biol Chem* **285**: 26532-26544.
- 957 **Ye W, Shen C H, Lin Y, Chen P J, Xu X, Oelmüller R, Yeh KW, Lai Z** (2014) Growth  
958 promotion-related miRNAs in *Oncidium* orchid roots colonized by the endophytic fungus  
959 *Piriformospora indica*. *PLoS One* **9**: e84920.
- 960 **Zuccaro A, Lahrmann U, Güldener U, Langen G, Pfiffi S, Biedenkopf D, Wong P, Samans**  
961 **B, Grimm C, Basiewicz M, Murat C** (2011) Endophytic life strategies decoded by genome and

962 transcriptome analyses of the mutualistic root symbiont *Piriformospora indica*. PLoS  
963 Pathogens **7**: e1002290.

**Figure 1.**

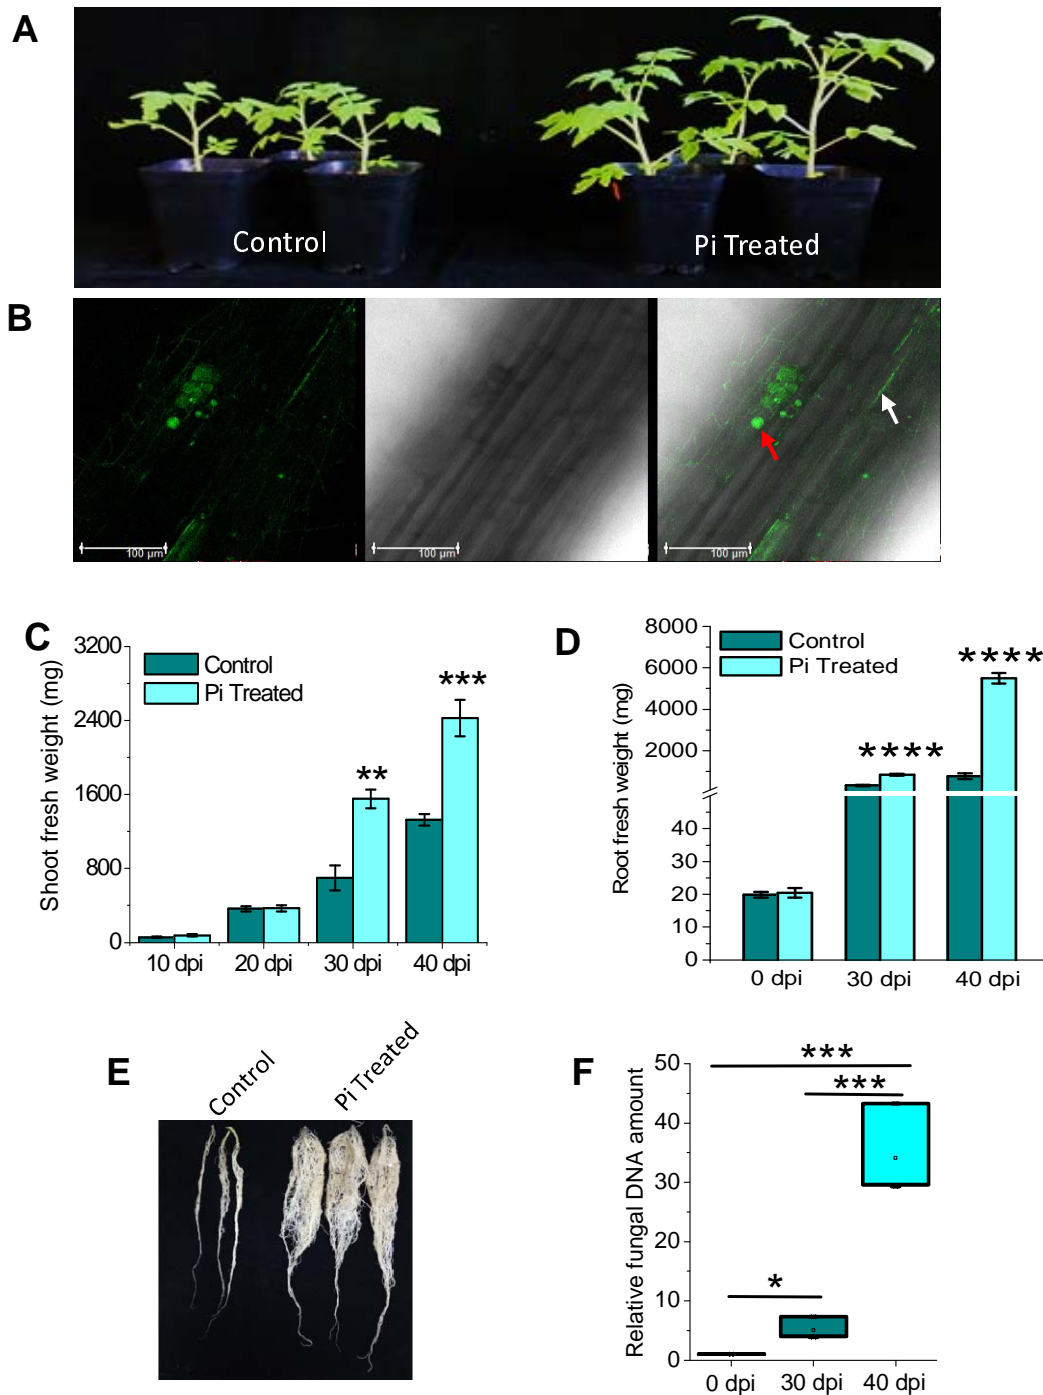

**Figure 1.** Effect of *P. indica* (Pi) treatment on phenotype of tomato (*S. lycopersicum*) plants in a time course (A) Representative *S. lycopersicum* shoot growth in non-inoculated (left tray) and *P. indica* inoculated (right tray) pots. The experiment was conducted three independent times. (B) GFP-labeled *P. indica* colonization pattern after 40 dpi in tomato root; (left) fluorescence, (middle) bright field, (right) merged image. Red and white arrows indicate *P. indica* chlamydozoospores and mycelia respectively. (C) Mean of shoot fresh weight  $\pm$  S.E. (n = 10) at different time points after upon *P. indica* inoculation. (D) Quantification of root growth upon 30 dpi and 40 dpi of *P. indica* inoculation (n = 10). (E) Visualization of root growth upon 40 days of *P. indica* inoculation. The figure is the best representative of three independent experimental sets. (F) Quantification of *P. indica* colonization (n = 4) in roots after 30 dpi and 40 dpi of inoculation. 0 dpi denotes first day of inoculation. Relative fungal colonization was measured by subtracting the  $C_T$  values of *P. indica Tef1* from  $C_T$  values of tomato *UBI3* gene. Significance analysis was done by unpaired *t*-test; \* $P < 0.05$ , \*\* $P < 0.01$ , \*\*\* $P < 0.001$ , \*\*\*\* $P < 0.0001$ .

## Figure 2

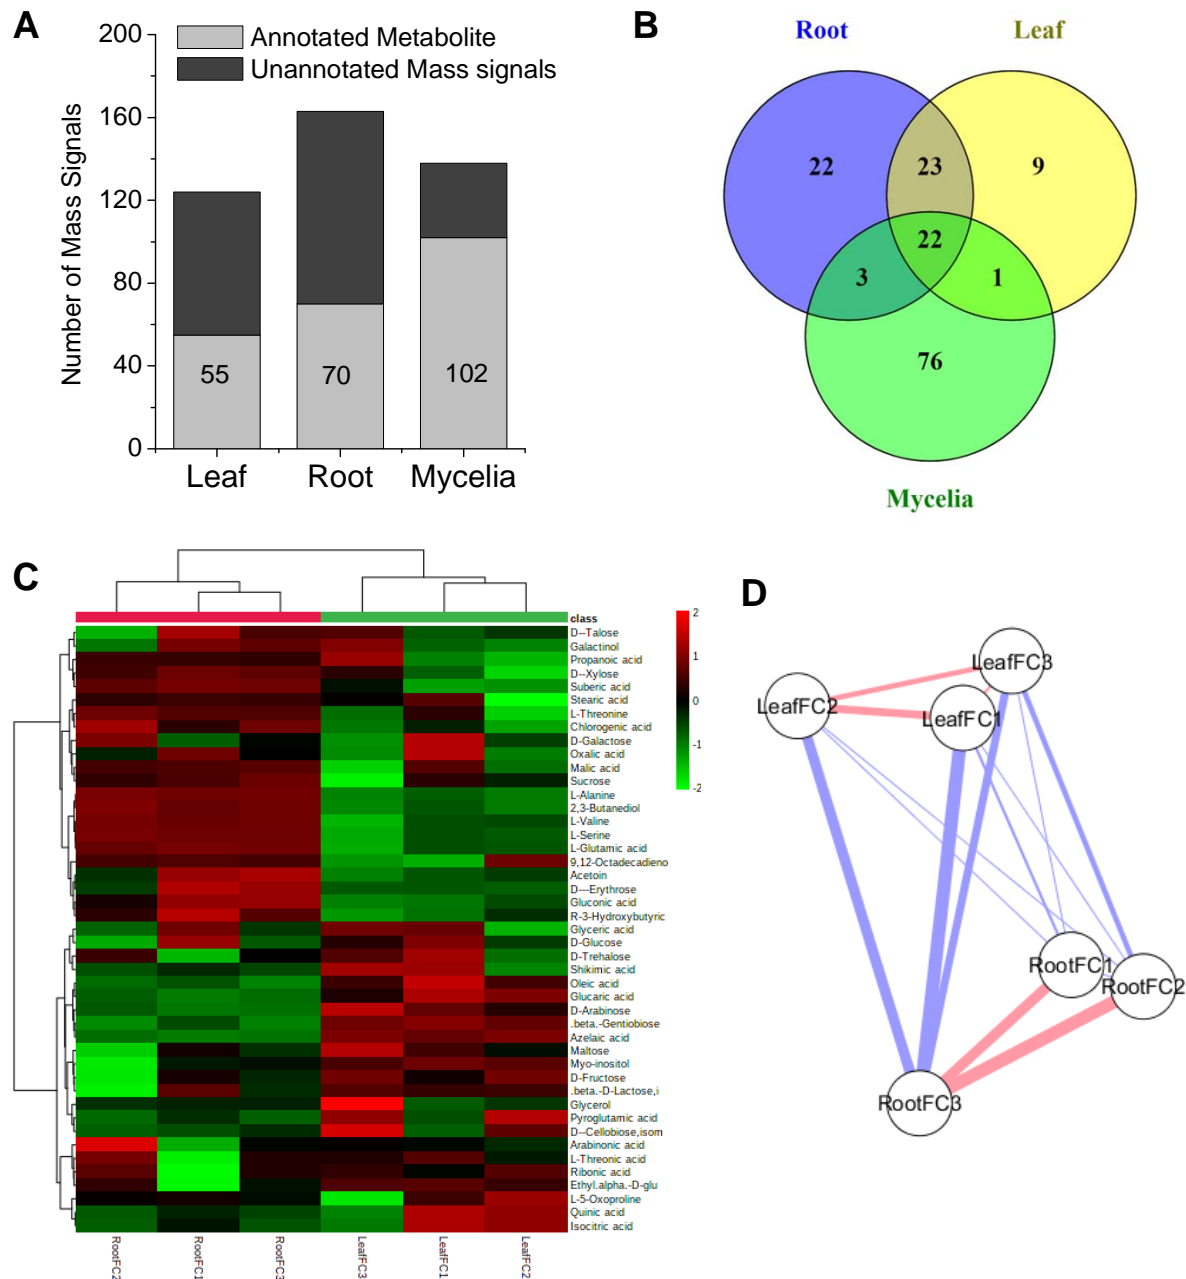

**Figure 2.** Alteration of annotated metabolites in tomato leaf, root and *P. indica* mycelia. (A) Mean of total number of GC-MS mass signals ( $n = 3$ , each replicate is the pool of three individual plants) compared to number of identified and annotated metabolites detected in leaf and root (control and *P. indica* treated) of tomato and *P. indica* mycelia. (B) Venn diagram to show comparative metabolite profile and number of specific and common metabolites detected in leaf, root and *P. indica* mycelia. (C) Heat map with Pearson's correlation based clustering (algorithm: complete) of Log<sub>2</sub> fold change of 45 common metabolites in *S. lycopersicum* root and leaf. Scale shows change values. Heat map was generated in MetaboAnalyst 4.0. (D) Pearson correlation network in between root and leaf ( $n = 3$ ) on the basis of Log<sub>2</sub> fold change values of the 45 common metabolites in leaf and roots. Nodes represent leaves and roots, edges represent correlations (blue: negative correlation; red positive correlation); thickness of the edges represents correlation strength. Pearson correlations was calculated in MetaboAnalyst correlation algorithm and the network is generated in Cytoscape 3.2.0 aided with MetScape.

**Figure 3**

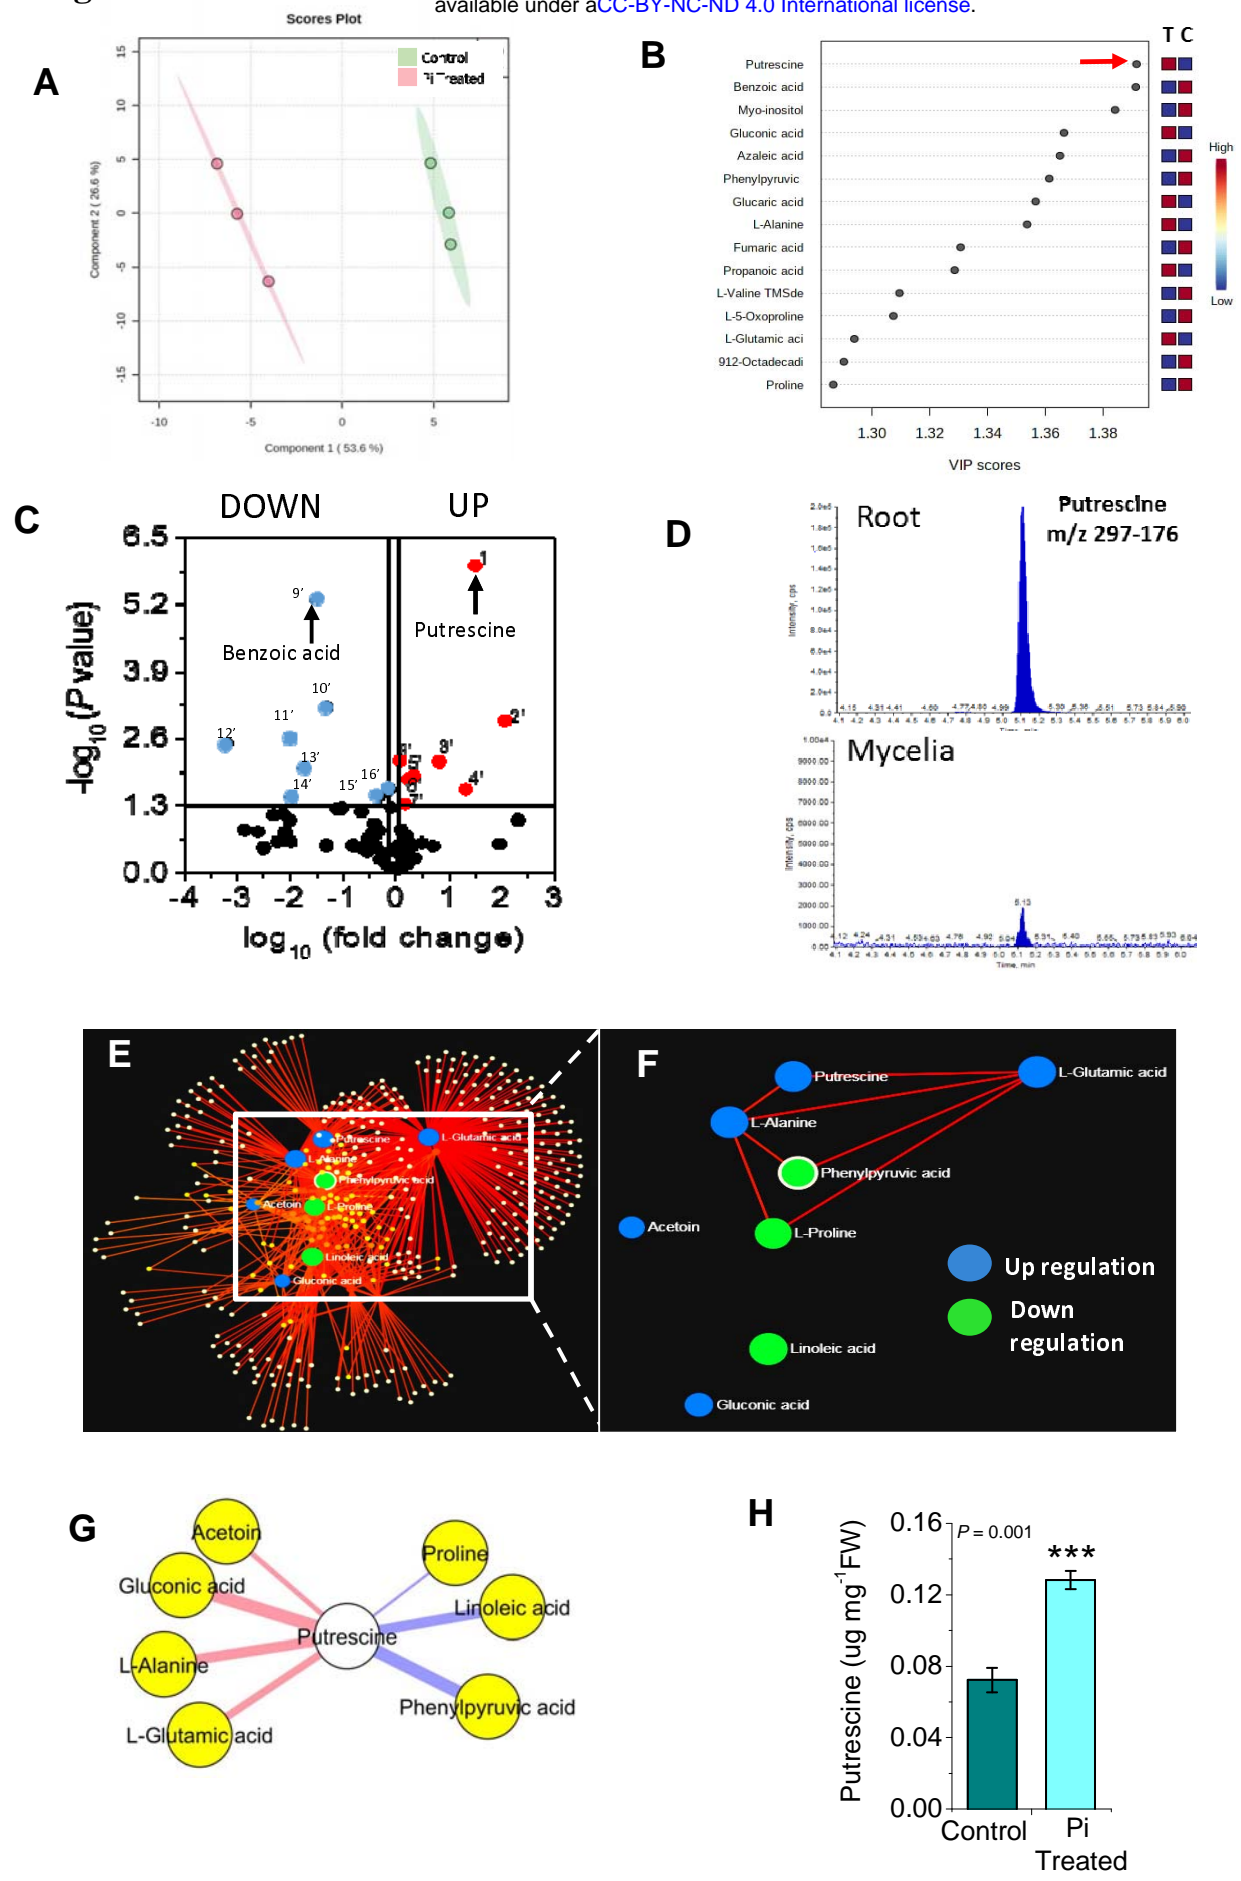

**Figure 3.** Analysis of differential alteration of root metabolite (A) PLS-DA score plot of control and *P. indica* treated root samples on the basis of 77 metabolite's normalized peak areas. (B) VIP (variables of importance) score plot shows top fifteen variables (metabolites) of importance in the root. Red arrow indicates putrescine with highest VIP score. (C) Volcano plot shows up-regulation (Red) of eight metabolites and down regulation (Blue) of eight metabolites in root. Point denoted as 1' shows maximum up-regulated putrescine and 9' shows maximum down regulated benzoic acid. Numbering of the denoted metabolites are described in figure S5.(D) Comparative LC-MS/MS XIC showing putrescine (Q1-Q3: m/z 297-176) peaks in root and mycelia. (E) Metabolite-metabolite interaction network constructed with the fold change values of significantly altered root metabolites, which predicted 404 plausible nodes (metabolites) and 830 plausible edges (interactions). (F) Zoomed view of interaction network in between up-regulated and down-regulated metabolites. (G) Correlation network of interacting upregulated and down regulated metabolites with putrescine. (H) Mean  $\pm$  SE of absolute amount of putrescine in control and *P. indica* colonized *S. lycopersicum* roots after 40 dpi. Significance analysis was done by unpaired *t*-test; \* $P < 0.05$ , \*\* $P < 0.01$ , \*\*\* $P < 0.005$

## Figure 4.

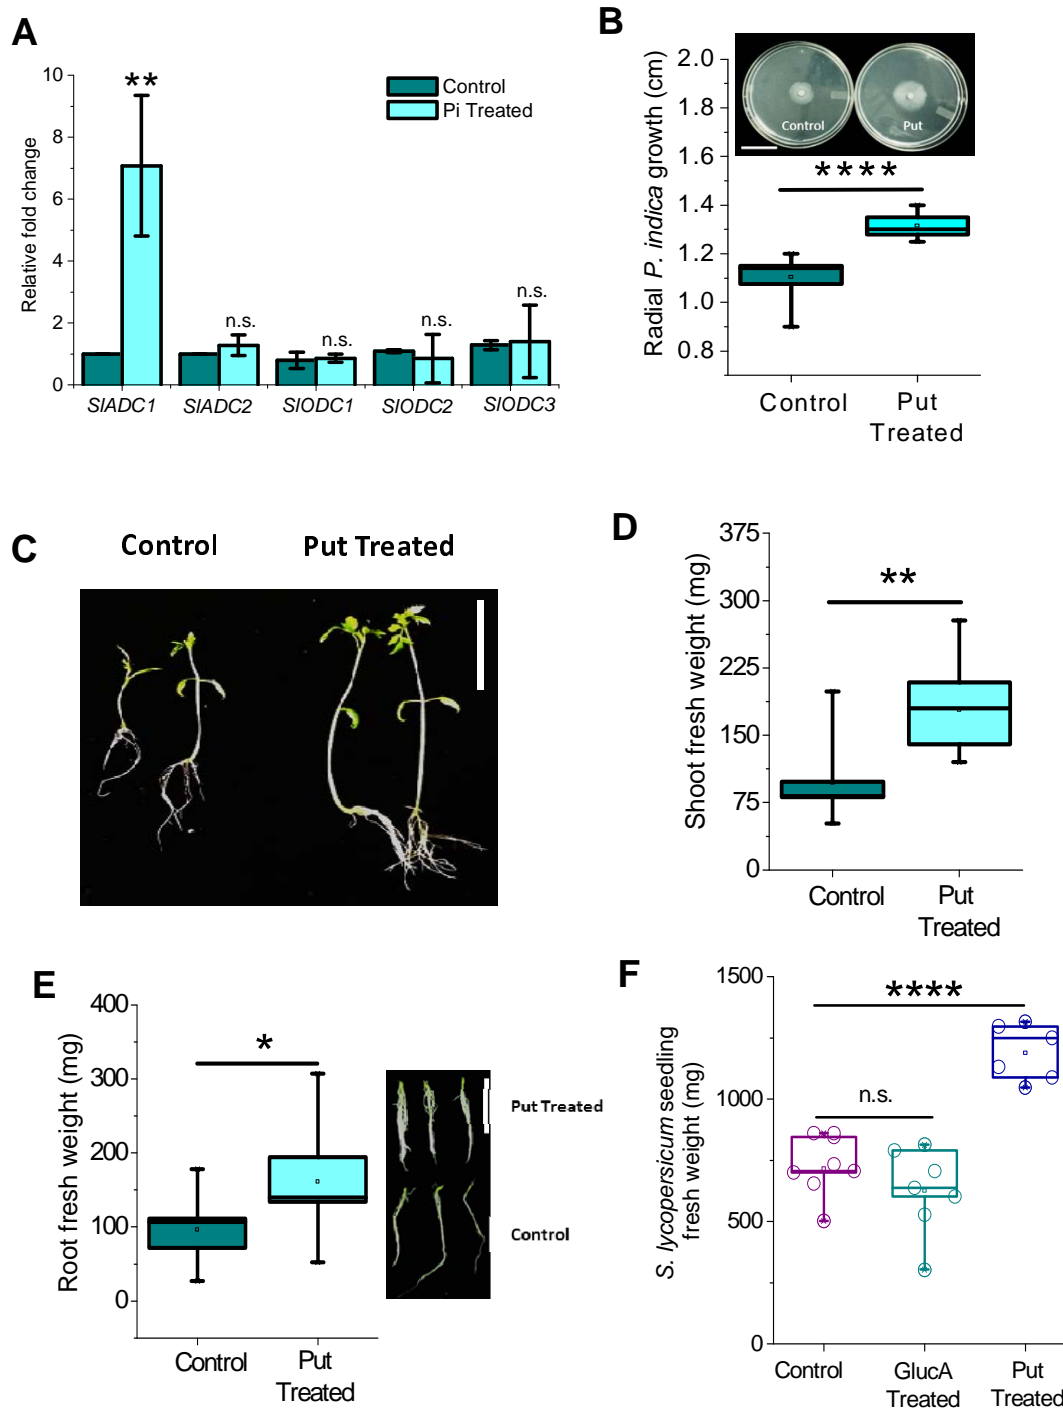

**Figure 4.** Effect of exogenous putrescine on *P. indica* and *S. lycopersicum* growth and alteration of putrescine biosynthetic genes in *S. lycopersicum* upon *P. indica* (*Pi*) colonization. (A) Mean  $\pm$  SE of arginine decarboxylase (*SIADC*) and ornithine decarboxylase (*SIODC*) transcript levels after 40 dpi of *P. indica* inoculation (n = 4). Controls of *SIADC1* and *SIADC2* has error bars merged with the bar's out line as they have small values. (B) Quantification of radial growth of *P. indica* upon 10  $\mu$ M putrescine treatment (n = 10). Inset shows the visualization of the radial growth. (C) Visualization of phenotype of growth in *S. lycopersicum* seedlings upon 10  $\mu$ M putrescine treatment. Scale bar: ~4.5 cm. The figure is the representative of 10 replicates. Quantification of (D) shoot fresh weight and (E) root fresh weight of *S. lycopersicum* and visualization of root growth upon 10  $\mu$ M putrescine treatment (n = 10). Scale bar: ~4 cm. (F) Fresh weight of *S. lycopersicum* seedlings upon 10  $\mu$ M Gluconic Acid (GlucA) and 10  $\mu$ M Putrescine (Put) Treatment. Significance analysis was done by unpaired *t*-test; \* $P$ <0.05, \*\* $P$ <0.01, \*\*\* $P$ <0.001, \*\*\*\* $P$ <0.0001.

**Figure 5.**

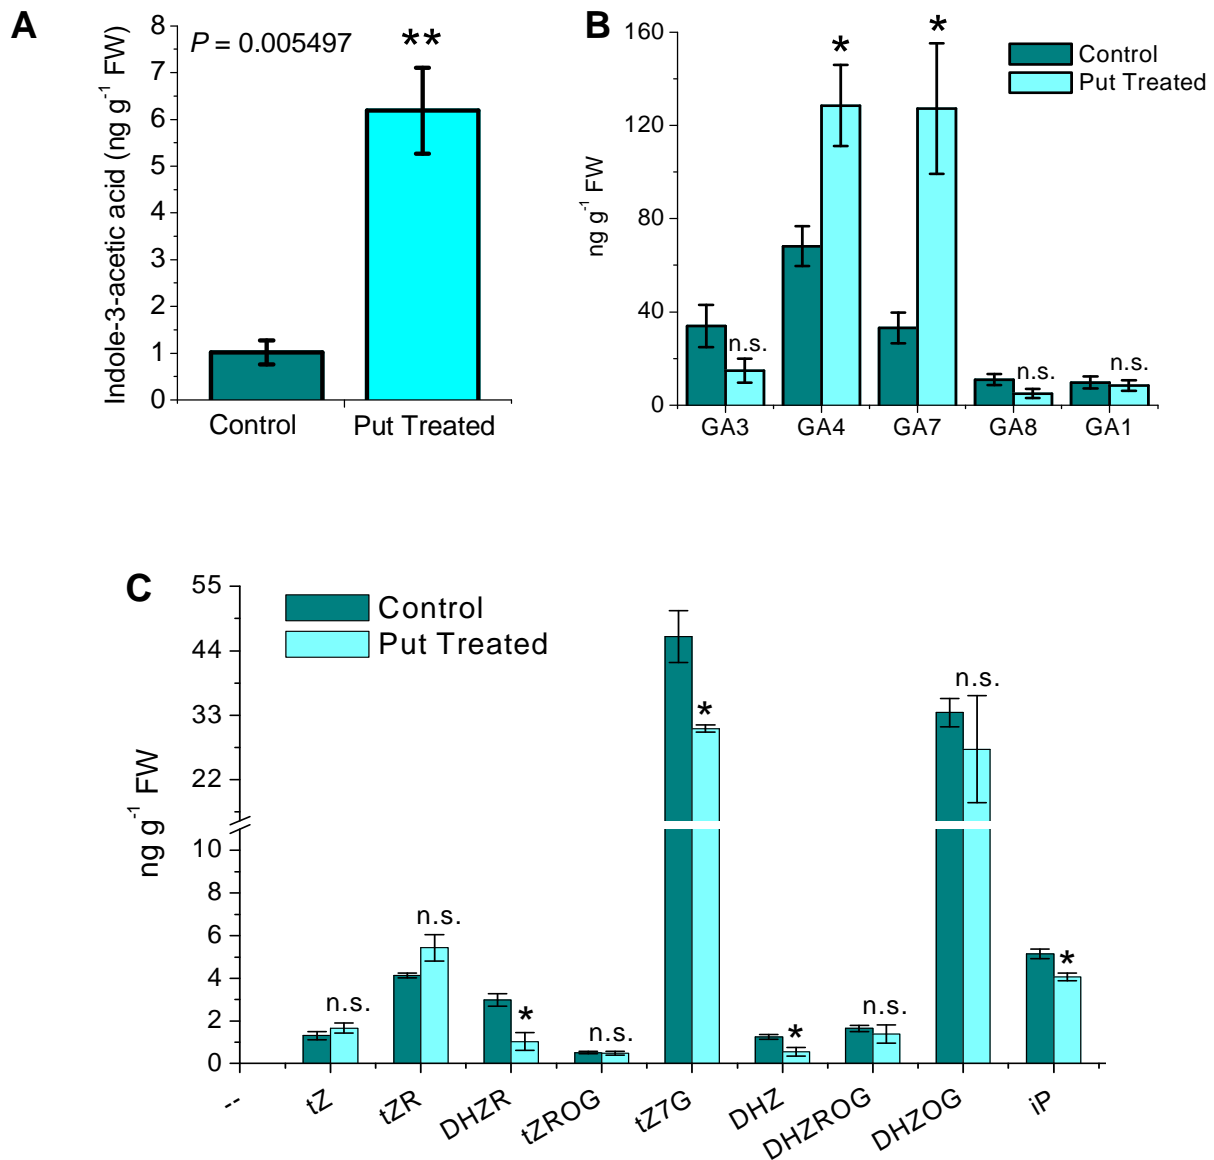

**Figure 5.** Effect of exogenous putrescine on growth phytohormone levels in *S. lycopersicum*. (A) Mean  $\pm$  SE (n = 4) of indole-3-acetic acid (IAA). (B) Mean  $\pm$  SE (n = 4) of gibberellins (GA<sub>1</sub>, GA<sub>3</sub>, GA<sub>4</sub>, GA<sub>7</sub> and GA<sub>8</sub>). (C) Mean  $\pm$  SE (n = 4) of different cytokinins in control and 10  $\mu$ M putrescine treated *S. lycopersicum* seedlings. tZ, *trans*-zeatin; tZR, *trans*-zeatin riboside; DHZR, dihydrozeatin riboside; tZROG, *trans*-zeatin riboside-*O*-glucoside; tZ7G, *trans*-zeatin-7-glucoside; DHZ, dihydrozeatin; DHZROG, dihydrozeatin riboside-*O*-glucoside; DHZOG, dihydrozeatin-*O*-glucoside; iP, isopentenyladenine. Significance analysis was done by unpaired *t*-test. \* $P < 0.05$ , \*\* $P < 0.01$ .



## Figure 6.

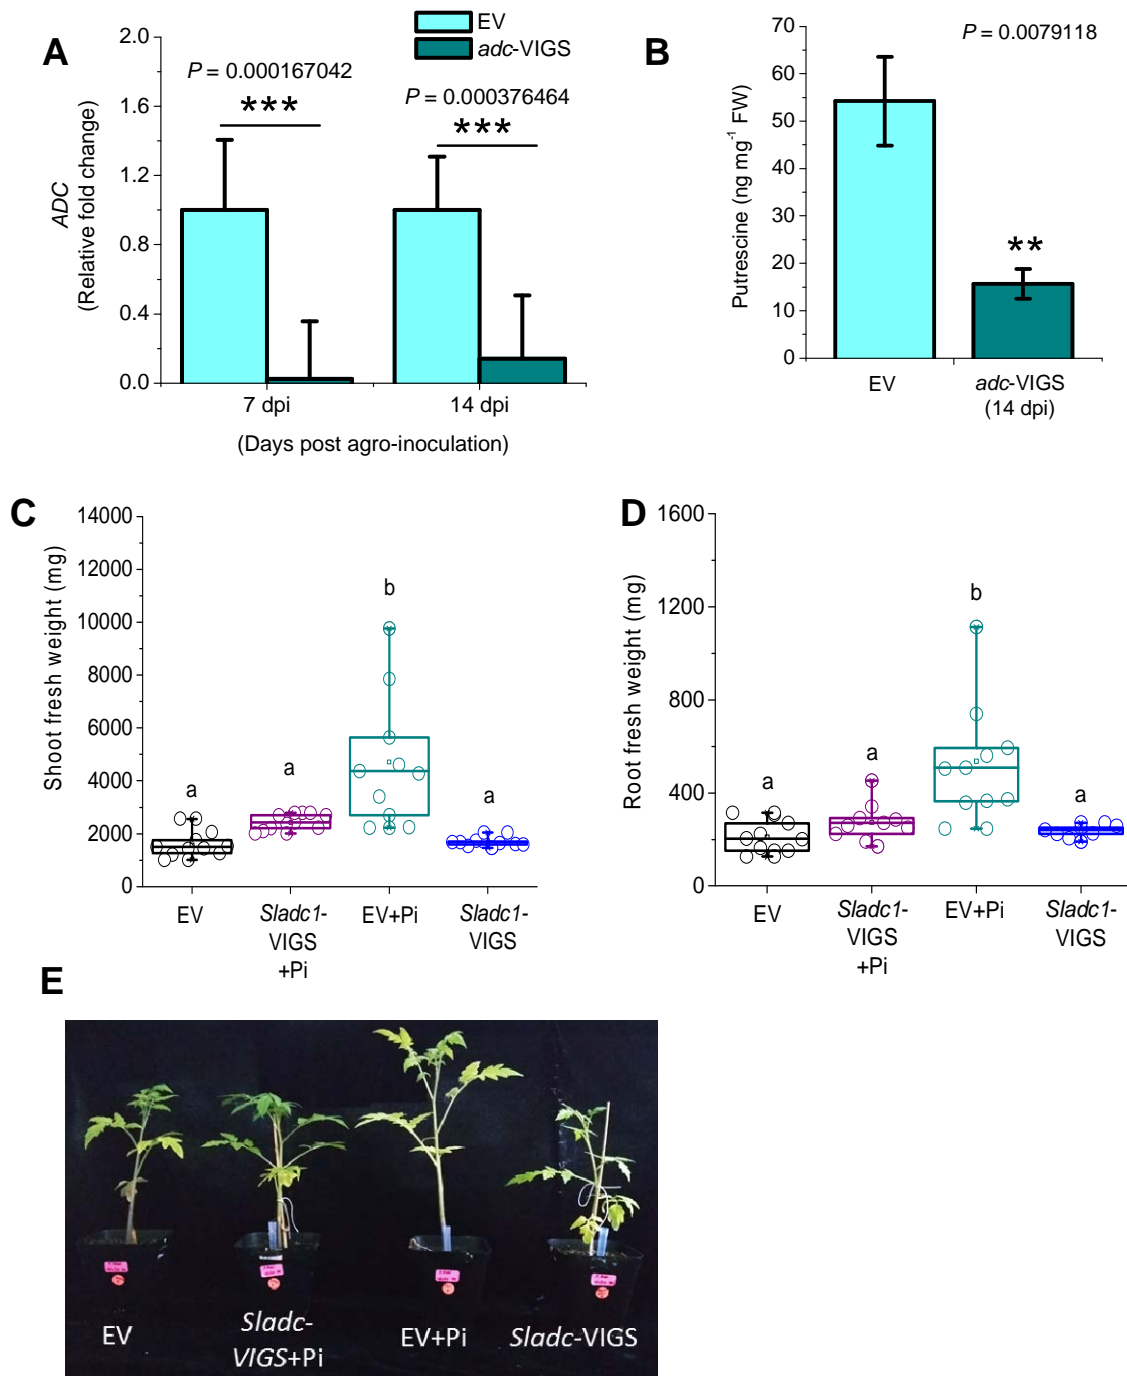

**Figure 6.** *P. indica* mediated growth in *S. lycopersicum* *Sladc1*-VIGS plants. (A) Mean + SE of arginine decarboxylase (ADC) transcript levels in EV and *adc1*-VIGS *S. lycopersicum* after 7 dpi and 14 dpi (n = 4). Silencing efficiency at 7 dpi is 97.41% and at 14 dpi is 85.93%. (B) Mean ± SE of putrescine content in EV and *Sladc1*-VIGS plants (n = 4). Significance analysis was done by unpaired *t*-test; \**P*<0.05, \*\**P*<0.01, \*\*\**P*<0.001. Quantification of the (C) root fresh weight (n = 10) and (D) shoot fresh weight (n = 8-10) in EV and *Sladc1*-VIGS. Significance analysis was done by analysis of variance (ANOVA) followed by Tukey's test. Different letters denoted significant differences. (E) Visualization of phenotypic changes and growth promotion of EV and *adc1*-VIGS plants after 40 dpi of *P. indica* infestation. This figure is a representative of 8-10 biological replicates of each of the plants.

**Figure 7.**

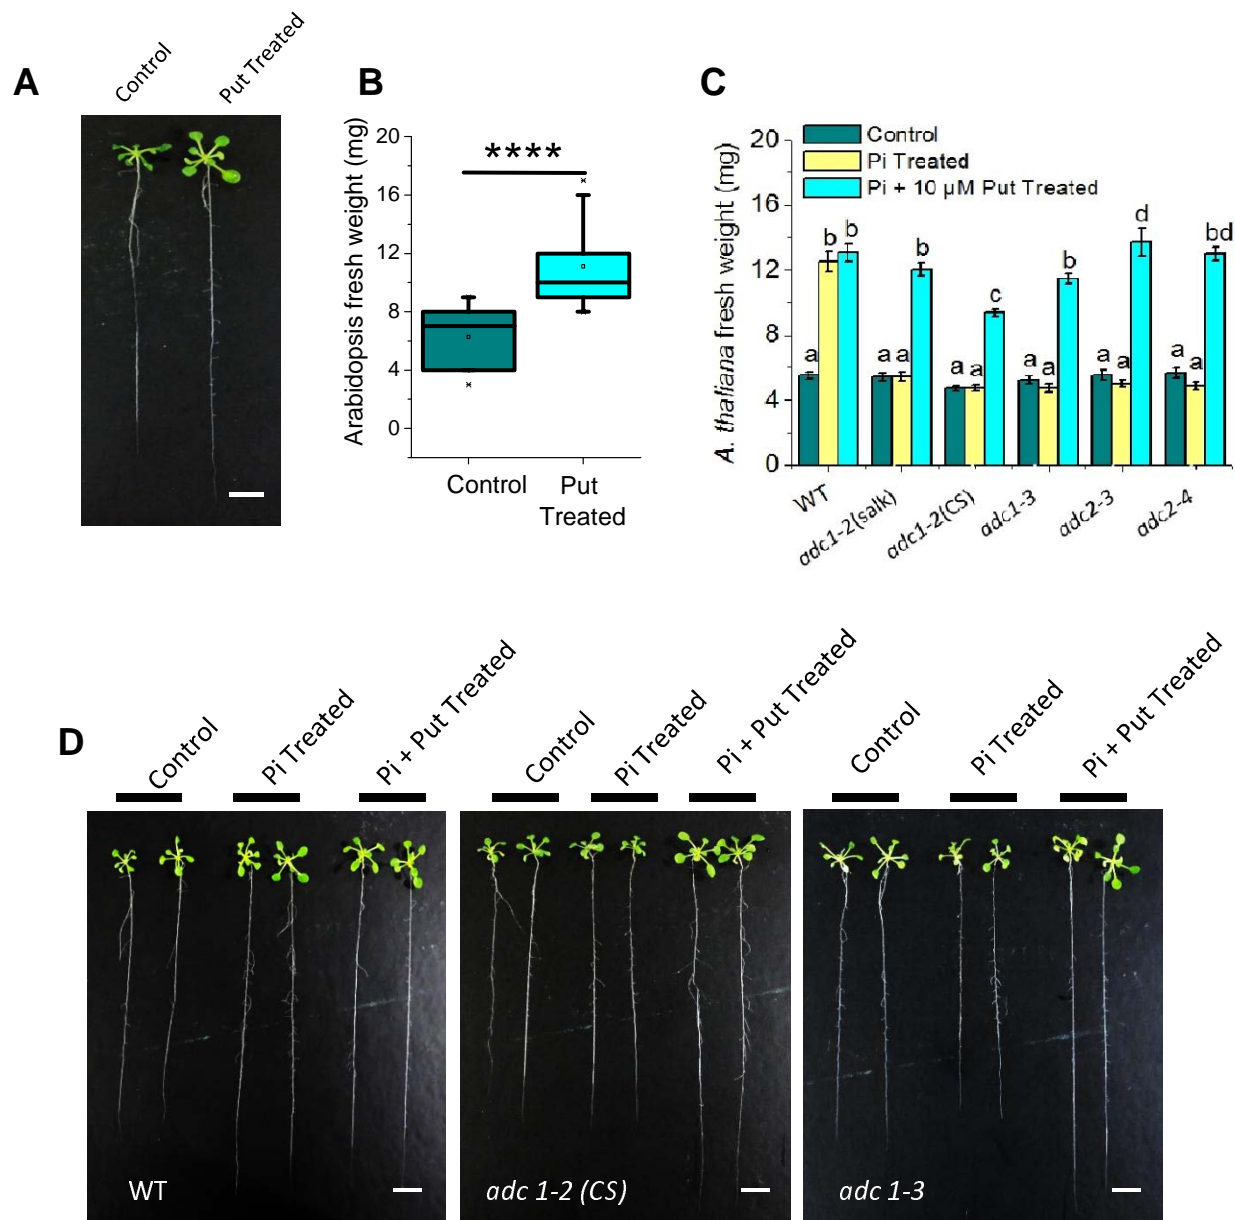

**Figure 7.** Effect of putrescine on Arabidopsis growth (A) Representative figure of 14 days old Arabidopsis seedlings treated with 10  $\mu$ M putrescine (n=12) (B) Quantification of fresh weight of seven days old Arabidopsis seedlings upon 10 $\mu$ M putrescine treatment (n = 12). Significant analysis was done by unpaired *t*-test (\*\*\*\**P*<0.0001). (C) Growth promotion assay in putrescine biosynthetic mutants along with gain of function assay by putrescine supplementation. Mean  $\pm$  SE (n = 22 - 30). Significance analysis was done by ANOVA (\**P*<0.05). (D) Representative figure of 22-30 biological replicates of putrescine induced *P. indica* mediated growth promotion assay in two *adc* mutant lines of Arabidopsis (14 days old). Scale bar: 0.4 cm. The seedlings were transferred from plates to a black surface for photograph

**Figure 8.**

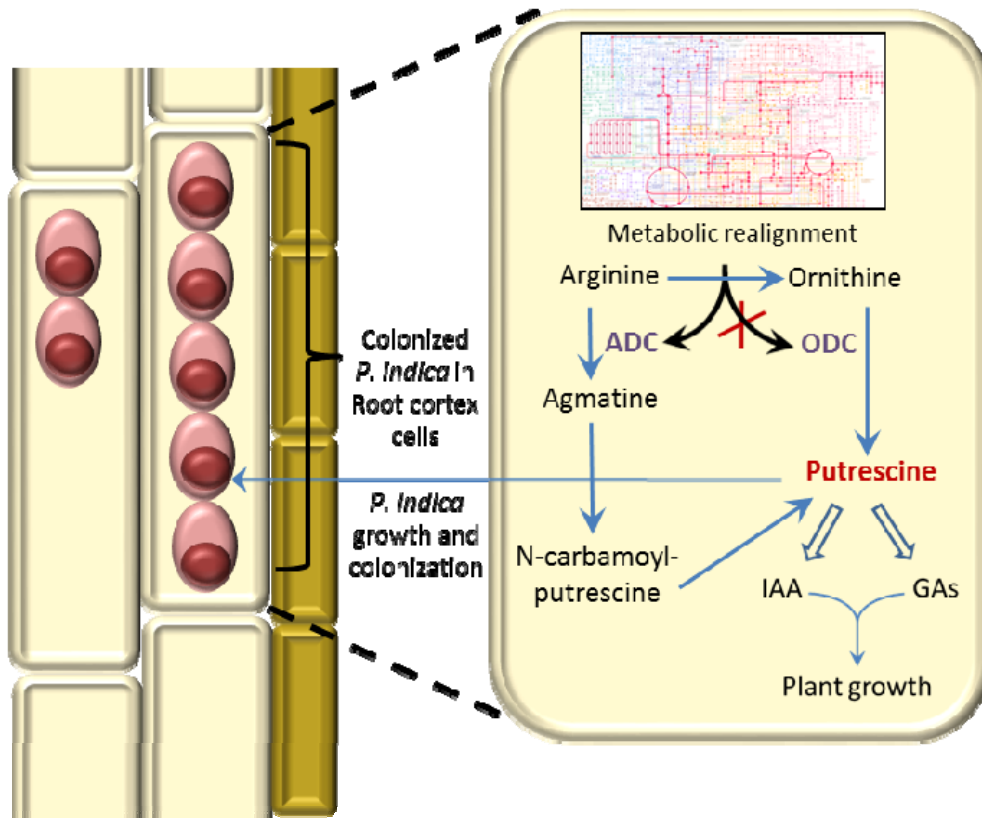

**Figure 8.** Schematic representation of *P. indica* induced putrescine biosynthesis in plants that promotes the growth of both plants and *P. indica*. *P. indica* realigns cellular metabolism and induces arginine decarboxylase (ADC) mediated putrescine biosynthesis. The other putrescine biosynthetic pathway mediated by ornithine decarboxylase (ODC) is not induced by *P. indica*. The increased biosynthesis of putrescine induces IAA and GAs which promotes growth in plants. Induced putrescine level also helps in *P. indica* growth.
